# Supplementary material for: The synthesis of arylcyanamides: a copper-catalyzed consecutive desulfurization and C–N cross-coupling strategy
Source: Royal Society of Chemistry journal article supplement (doi:10.1039/c7nj03527f), 2017-12-11
Supplement: c7nj03527f1.pdf [file c7nj03527f1.pdf]

## Supporting Information

### **The synthesis of arylcyanamides: Copper-catalyzed consecutive desulfurization and C-N cross-coupling strategy**

S N Murthy Boddapati,<sup>ab</sup> Naresh Polam<sup>a</sup>, Baby Ramana Mutchu<sup>a</sup>, Hari Babu Bollikolla<sup>a,\*</sup>

<sup>a</sup>*Department of Chemistry, Acharya Nagarjuna University, NNagar-522 510, Guntur, AP-India*

<sup>b</sup>*Department of Chemistry, C R Reddy P G College, Eluru-534002, AP-India*

| <b>Contents</b>                                                                                  | <b>Page</b> |
|--------------------------------------------------------------------------------------------------|-------------|
| General Information                                                                              | S2          |
| Experimental procedure for the synthesis of cyanamides and Characterization Data of the Products | S2-S10      |
| References                                                                                       | S10         |
| Scans of <sup>1</sup> H and <sup>13</sup> C Spectra                                              | S11-S32     |

**General Information:** Thiourea, DMSO, EtOH, EtOAc, n-Hexane, n-Heptane, 1,10-Phenanthroline, CuSO<sub>4</sub>·5H<sub>2</sub>O (98 %), CuI (98 %), CuBr (98 %), Cu<sub>2</sub>O (97 %), CuCl (99 %), CuSO<sub>4</sub>·5H<sub>2</sub>O (99 %) and Cu(OAc)<sub>2</sub>·H<sub>2</sub>O (98 %), Et<sub>3</sub>N, sodium bicarbonate, K<sub>3</sub>PO<sub>4</sub>·3H<sub>2</sub>O, KOH, K<sub>2</sub>CO<sub>3</sub>, Cs<sub>2</sub>CO<sub>3</sub> were purchased from Aldrich and used without further purification. The solvents were purchased and dried according to standard procedure prior to use.<sup>1</sup> <sup>1</sup>H NMR (400 MHz) spectra were recorded with a Varian 400 spectrometer. Infrared (IR) spectra recorded on a Perkin Elmer Spectrum one FT-IR spectrometer. VKSI Medico Centrifuge machine was used for our experimental procedure for the synthesis of substituted cyanamides.

### **Experimental section:**

**General Procedure for construction of Phenylcyanamide:** To a stirred solution of DMSO solvent (2-3 mL), thiourea (1 mmol, 76 mg) was added slowly followed by Et<sub>3</sub>N (1 mmol, 101 mg) and CuSO<sub>4</sub>·5H<sub>2</sub>O (50 mol %, 125 mg) at room temperature. The whole reaction mixture is stirred for one hour (until get the black color) at room temperature. After completion of the reaction (monitored by TLC), to this, iodobenzene (1 mmol, 204 mg), Cs<sub>2</sub>CO<sub>3</sub> (1 mmol, 325 mg), CuSO<sub>4</sub>·5H<sub>2</sub>O (10 mol %, 25 mg) and 1,10-phenanthroline (20 mol %, 36 mg) were slowly added consecutively for several minutes and the reaction mixture was stirred for 12 h at 80 °C. The progress of the reaction was investigated by TLC (5 % ethylacetate in hexane). After completion of reaction, the reaction mixture was transferred into centrifuged tubes and the mixture was centrifuged for 10 min by using centrifugation machine. Black color solid was settled in the bottom of centrifuged tubes. The clear solution was concentrated by using rotary evaporator and the crude mixture was purified by silica gel (60-120 mesh) column chromatography using 5 % ethylacetate in hexane as eluent to obtain a phenyl cyanamide **2a** as a white solid.

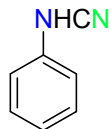

**Phenylcyanamide 2a<sup>1</sup>**: Analytical TLC on silica gel, 1:19 ethyl acetate/hexane  $R_f = 0.8$ ; yield 90 %;  $^1\text{H NMR}$  (400 MHz,  $\text{CDCl}_3$ )  $\delta$  7.37-7.33 (m, 2H), 7.29-7.25 (m, 3H);  $^{13}\text{C NMR}$  (100 MHz,  $\text{CDCl}_3$ )  $\delta$  137.8, 130.6, 130.1, 128.9, 114.3; FT-IR (KBr) 3350, 3064, 2222, 1693, 1489, 1250, 1070, 909  $\text{cm}^{-1}$ . Anal. Calcd. for  $\text{C}_7\text{H}_6\text{N}_2$ : C, 71.17; H, 5.12; N, 23.71. Found: C, 71.28; H, 5.09; N, 23.62.

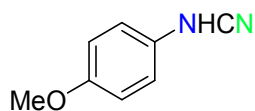

**4-Methoxyphenylcyanamide 2b<sup>2</sup>**: Analytical TLC on silica gel, 1:19 ethyl acetate/hexane  $R_f = 0.8$ ; yield 95 %;  $^1\text{H NMR}$  (400 MHz,  $\text{CDCl}_3$ )  $\delta$  7.18 (d,  $J = 8.8$  Hz, 2H), 7.02 (d,  $J = 9.6$  Hz, 2H), 5.81 (br s, 1NH), 3.33 (s, 3H);  $^{13}\text{C NMR}$  (100 MHz,  $\text{CDCl}_3$ )  $\delta$  164.1, 138.6, 131.9, 127.8, 121.7, 55.4; FT-IR (KBr) 3357, 3076, 2899, 2236, 1587, 1253, 1212, 1104, 1055, 941, 808  $\text{cm}^{-1}$ . Anal. Calcd. for  $\text{C}_8\text{H}_8\text{N}_2\text{O}$ : C, 64.85; H, 5.44; N, 18.91; O, 10.80. Found: C, 64.99; H, 5.42; N, 18.85.

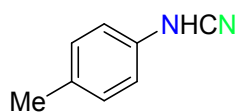

**4-Methylphenylcyanamide 2c<sup>1</sup>**: Analytical TLC on silica gel, 1:19 ethyl acetate/hexane  $R_f = 0.8$ ; yield 95 %;  $^1\text{H NMR}$  (400 MHz,  $\text{CDCl}_3$ )  $\delta$  7.23-7.17 (m, 2H), 7.01 (d,  $J = 9.6$  Hz, 2H), 2.33 (s, 3H);  $^{13}\text{C NMR}$  (100 MHz,  $\text{CDCl}_3$ )  $\delta$  142.3, 132.4, 128.5, 124.6, 120.0, 21.3; FT-IR (KBr) 3378, 3097, 2896, 2835, 2200, 1601, 1580, 1503, 1252, 1179, 1028, 927  $\text{cm}^{-1}$ . Anal. Calcd. for  $\text{C}_8\text{H}_8\text{N}_2$ : C, 72.70; H, 6.10; N, 21.20. Found: C, 72.79; H, 6.09; N, 21.12.

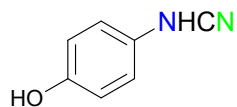

**4-Hydroxyphenylcyanamide 2d:** Analytical TLC on silica gel, 1:19 ethyl acetate/hexane  $R_f = 0.8$ ; yield 79 %;  $^1\text{H NMR}$  (400 MHz,  $\text{CDCl}_3$ )  $\delta$  7.26-7.17 (m, 2H), 7.04-7.01 (m, 2H), 5.81 (br s, 1NH);  $^{13}\text{C NMR}$  (100 MHz,  $\text{CDCl}_3$ )  $\delta$  154.1, 138.0, 132.0, 127.8, 115.7; FT-IR (KBr) 3357, 3087, 2236, 1587, 1287, 1201, 1123, 1055, 971, 808  $\text{cm}^{-1}$ . Anal. Calcd. for  $\text{C}_7\text{H}_6\text{N}_2\text{O}$ : C, 62.68; H, 4.51; N, 20.88; O, 11.93. Found: C, 62.82; H, 4.48; N, 20.82.

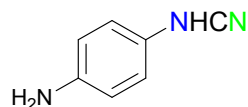

**4-Aminophenylcyanamide 2e:** Analytical TLC on silica gel, 1:19 ethyl acetate/hexane  $R_f = 0.8$ ; yield 67 %;  $^1\text{H NMR}$  (400 MHz,  $\text{CDCl}_3$ )  $\delta$  7.25-7.18 (m, 2H), 6.48-6.41 (m, 2H), 5.28 (br s,  $\text{NH}_2$ );  $^{13}\text{C NMR}$  (100 MHz,  $\text{CDCl}_3$ )  $\delta$  139.1, 132.5, 130.6, 129.1, 117.1; FT-IR (KBr) 3378, 3357, 3097, 2200, 1615, 1556, 1221, 1154, 927  $\text{cm}^{-1}$ . Anal. Calcd. for  $\text{C}_7\text{H}_7\text{N}_3$ : C, 63.14; H, 5.30; N, 31.56. Found: C, 63.24; H, 5.27; N, 31.49.

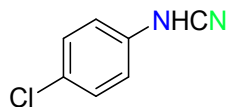

**4-Chlorophenylcyanamide 2f:** Analytical TLC on silica gel, 1:19 ethyl acetate/hexane  $R_f = 0.6$ ; Yield 80%;  $^1\text{H NMR}$  (400 MHz,  $\text{CDCl}_3$ )  $\delta$  7.22 (d,  $J = 8.8$ , 2H), 6.97-6.93 (m, 2H);  $^{13}\text{C NMR}$  (100 MHz,  $\text{CDCl}_3$ )  $\delta$  139.1, 132.5, 130.6, 129.1, 117.1; FT-IR (KBr) 3399, 3076, 2214, 1670, 1505, 1250, 1114, 1023, 959, 817  $\text{cm}^{-1}$ . Anal. Calcd. for  $\text{C}_7\text{H}_5\text{ClN}_2$ : C, 55.10; H, 3.30; Cl, 23.24; N, 18.36. Found: C, 55.25; H, 3.28; N, 18.30.

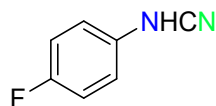

**4-Fluorophenylcyanamide 2g:** Analytical TLC on silica gel, 1:5 ethyl acetate/hexane  $R_f = 0.6$ ; yield 72 %;  $^1\text{H NMR}$  (400 MHz,  $\text{CDCl}_3$ )  $\delta$  7.32-7.29 (m, 2H), 7.22 (d,  $J = 8.8$  Hz, 2H), 6.39 (br s, 1NH);  $^{13}\text{C NMR}$  (100 MHz,  $\text{CDCl}_3$ )  $\delta$  154.7, 136.5, 126.2, 120.3, 114.9; FT-IR (KBr) 3359, 3056, 2217, 1654, 1554, 1394, 1279, 1140, 939, 822  $\text{cm}^{-1}$ . Anal. Calcd. for  $\text{C}_7\text{H}_5\text{FN}_2$ : C, 61.76; H, 3.70; F, 13.96; N, 20.58. Found: C, 61.92; H, 3.67; N, 13.89.

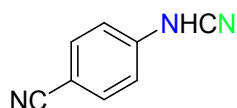

**4-(Cyanoamino)benzonitrile 2h:** Analytical TLC on silica gel, 1:5 ethyl acetate/hexane  $R_f = 0.5$ ; yield 40 %;  $^1\text{H NMR}$  (400 MHz,  $\text{CDCl}_3$ )  $\delta$  7.40-7.37 (m, 2H), 7.34-7.31 (m, 2H);  $^{13}\text{C NMR}$  (100 MHz,  $\text{CDCl}_3$ )  $\delta$  140.4, 132.7, 128.1, 120.0, 115.6, 115.0; FT-IR (KBr) 3355, 3100, 2256, 2217, 1667, 1526, 1348, 1277, 1078, 973, 892  $\text{cm}^{-1}$ . Anal. Calcd. for  $\text{C}_8\text{H}_5\text{N}_3$ : C, 67.12; H, 3.52; N, 29.35. Found: C, 67.20; H, 3.50; N, 29.29.

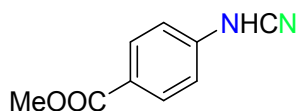

**Methyl-4-(cyanoamino)benzoate 2i:** Analytical TLC on silica gel, 1:4 ethyl acetate/hexane  $R_f = 0.5$ ; yield 40 %;  $^1\text{H NMR}$  (400 MHz,  $\text{CDCl}_3$ )  $\delta$  8.11 (d,  $J = 9.6$  Hz, 2H), 7.38-7.33 (m, 2H), 5.91 (br s, 1NH), 3.80 (s, 3H);  $^{13}\text{C NMR}$  (100 MHz,  $\text{CDCl}_3$ )  $\delta$  166.8, 142.8, 134.4, 130.5, 130.0, 121.7, 54.8; FT-IR (KBr) 3415, 3082, 2896, 2234, 1749, 1675, 1607, 1524, 1459, 1345, 1261, 1145, 1099, 870  $\text{cm}^{-1}$ . Anal. Calcd. for  $\text{C}_9\text{H}_8\text{N}_2\text{O}_2$ : C, 61.36; H, 4.58; N, 15.90; O, 18.16. Found: C, 61.50; H, 4.56; N, 15.84.

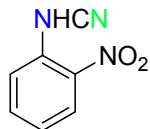

**2-Nitrophenylcyanamide 2j:** Analytical TLC on silica gel, 1:4 ethyl acetate/hexane  $R_f = 0.5$ ; yield 60 %;  $^1\text{H NMR}$  (400 MHz,  $\text{CDCl}_3$ )  $\delta$  8.40 (d,  $J = 9.2$  Hz, 2 H), 7.65 (d,  $J = 8.8$  Hz, 2 H);  $^{13}\text{C NMR}$  (100 MHz,  $\text{CDCl}_3$ )  $\delta$  149.6, 141.6, 136.7, 134.0, 132.1, 120.9, 115.1; FT-IR (KBr) 3375, 3065, 2215, 1656, 1564, 1490, 1379, 1229, 1125, 1036, 941, 832  $\text{cm}^{-1}$ . Anal. Calcd. for  $\text{C}_7\text{H}_5\text{N}_3\text{O}_2$ : C, 39.73; H, 3.33; N, 10.30. Found: C, 39.88; H, 3.30; N, 10.23.

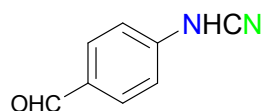

**4-Formylphenylcyanamide 2k:** Analytical TLC on silica gel, 1:9 ethyl acetate/hexane  $R_f = 0.8$ ; yield 57 %;  $^1\text{H NMR}$  (400 MHz,  $\text{CDCl}_3$ )  $\delta$  9.33 (s, 1H), 7.76-7.67 (m, 2H), 7.04-7.01 (m, 2H);  $^{13}\text{C NMR}$  (100 MHz,  $\text{CDCl}_3$ )  $\delta$  192.1, 145.6, 134.0, 132.1, 120.9, 115.1; FT-IR (KBr) 3355, 3219, 2256, 1750, 1687, 1603, 1556, 1352, 1254, 1102, 973, 892  $\text{cm}^{-1}$ . Anal. Calcd. for  $\text{C}_8\text{H}_6\text{N}_2\text{O}$ : C, 65.75; H, 4.14; N, 19.17; O, 10.95. Found: C, 65.89; H, 4.12; N, 19.10.

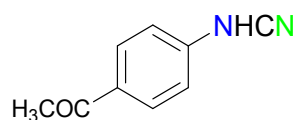

**4-Acetylphenylcyanamide 2l:** Analytical TLC on silica gel, 1:5 ethyl acetate/hexane  $R_f = 0.8$ ; yield 61 %;  $^1\text{H NMR}$  (400 MHz,  $\text{CDCl}_3$ )  $\delta$  8.11 (d,  $J = 9.6$  Hz, 2H), 7.38-7.33 (m, 2H), 5.91 (br s, 1H), 2.52 (s, 3H);  $^{13}\text{C NMR}$  (100 MHz,  $\text{CDCl}_3$ )  $\delta$  190.9, 144.5, 128.1, 120.0, 115.6, 115.0, 25.6; FT-IR (KBr) 3415, 3102, 2902, 2234, 1749, 1645, 1597, 1532, 1459, 1353, 1254, 1156, 1045, 892  $\text{cm}^{-1}$ . Anal. Calcd. for  $\text{C}_9\text{H}_8\text{N}_2\text{O}$ : C, 67.49; H, 5.03; N, 17.49; O, 9.99. Found: C, 67.61; H, 5.01; N, 17.43.

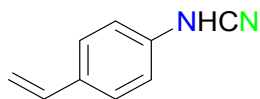

**4-Vinylphenylcyanamide 2m:** Analytical TLC on silica gel, 1:9 ethyl acetate/hexane  $R_f = 0.8$ ; yield 62 %;  $^1\text{H NMR}$  (400 MHz,  $\text{CDCl}_3$ )  $\delta$  7.35-7.30 (m, 2H), 7.26-7.21 (m, 2H), 6.73 (dd,  $J = 12.4, 16$  Hz, 1H), 6.09 (br, s, 1H), 5.55 (d,  $J = 14$  Hz, 1H), 4.95 (d,  $J = 8.8$  Hz, 1H);  $^{13}\text{C NMR}$  (100 MHz,  $\text{CDCl}_3$ )  $\delta$  139.6, 137.8, 134.5, 130.9, 129.9, 117.7, 113.9; FT-IR (KBr) 3375, 3199, 2215, 1656, 1602, 1564, 1490, 1379, 1229, 1125, 1036, 941, 832  $\text{cm}^{-1}$ . Anal. Calcd. for  $\text{C}_9\text{H}_8\text{N}_2$ : C, 74.98; H, 5.59; N, 19.43. Found: C, 75.08; H, 5.56; N, 19.36.

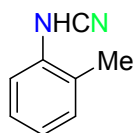

**o-Tolylcyanamide 2o<sup>2</sup>:** Analytical TLC on silica gel, 1:19 ethyl acetate/hexane  $R_f = 0.8$ ; yield 82 %;  $^1\text{H NMR}$  (400 MHz,  $\text{CDCl}_3$ )  $\delta$  7.26-7.21 (m, 1H), 7.17-7.12 (m, 2H), 6.99 (d,  $J = 8.8$  Hz, 1H), 6.09 (br s, 1NH), 2.14 (s, 3H);  $^{13}\text{C NMR}$  (100 MHz,  $\text{CDCl}_3$ )  $\delta$  147.0, 139.6, 137.8, 134.5, 130.9, 129.9, 117.0, 20.6; FT-IR (KBr) 3412, 3074, 2867, 2223, 1690, 1435, 1379, 1229, 1125, 1036, 941, 875  $\text{cm}^{-1}$ . Anal. Calcd. for  $\text{C}_8\text{H}_8\text{N}_2$ : C, 72.70; H, 6.10; N, 21.20. Found: C, 72.80; H, 6.02; N, 21.12.

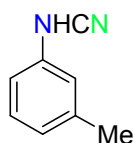

**m-Tolylcyanamide 2p<sup>2</sup>:** Analytical TLC on silica gel, 1:19 ethyl acetate/hexane  $R_f = 0.8$ ; yield 80 %;  $^1\text{H NMR}$  (400 MHz,  $\text{CDCl}_3$ )  $\delta$  7.39 (s, 1H), 7.22 (d,  $J = 8.8$ , 1H), 6.97-6.93 (m, 2H);  $^{13}\text{C NMR}$  (100 MHz,  $\text{CDCl}_3$ )  $\delta$  139.6, 131.6, 131.3, 130.4, 120.3, 120.0, 115.4, 24.1; FT-IR (KBr) 3423, 3048, 2899, 2217, 1656, 1588, 1490, 1409, 1288, 1261, 1123, 1078, 823. Anal. Calcd. for  $\text{C}_8\text{H}_8\text{N}_2$ : C, 72.70; H, 6.10; N, 21.20. Found: C, 72.80; H, 6.02; N, 21.12.

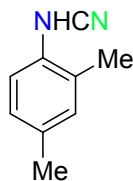

**2,4-Dimethylphenylcyanamide 2q<sup>1</sup>**: Analytical TLC on silica gel, 1:19 ethyl acetate/hexane  $R_f = 0.8$ ; yield 93 %;  $^1\text{H NMR}$  (400 MHz,  $\text{CDCl}_3$ )  $\delta$  7.03 (s, 1H), 6.85 (d,  $J = 7.6$  Hz, 1H), 6.56 (d,  $J = 8.0$  Hz, 1H), 2.30 (s, 3H), 2.27 (s, 3H);  $^{13}\text{C NMR}$  (100 MHz,  $\text{CDCl}_3$ )  $\delta$  139.6, 137.8, 134.5, 130.9, 129.9, 119.9, 113.9, 20.6, 18.2; FT-IR (KBr) 3368, 3077, 2888, 2863, 2212, 1635, 1599, 1513, 1491, 1287, 1215, 1027, 823  $\text{cm}^{-1}$ . Anal. Calcd. for  $\text{C}_9\text{H}_{10}\text{N}_2$ : C, 73.94; H, 6.89; N, 19.16. Found: C, 74.02; H, 6.88; N, 19.09.

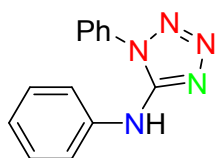

**N,1-Diphenyl-1H-tetrazol-5-amine A**: Analytical TLC on silica gel, 3:7 ethyl acetate/hexane  $R_f = 0.7$ ; yield 88 %;  $^1\text{H NMR}$  (400 MHz,  $\text{CDCl}_3$ )  $\delta$  7.54-7.41 (m, 7H), 6.85 (d,  $J = 8.8$  Hz, 3H), 6.02 (br s, 1NH);  $^{13}\text{C NMR}$  (100 MHz,  $\text{CDCl}_3$ )  $\delta$  138.4, 132.8, 131.6, 129.2, 128.5, 128.1, 121.5, 120.9, 117.6; FT-IR (KBr) 3426, 3097, 1645, 1631, 1567, 1512, 1491, 1287, 1250, 1146, 1027, 896  $\text{cm}^{-1}$ . Anal. Calcd. for  $\text{C}_{13}\text{H}_{11}\text{N}_5$ : C, 65.81; H, 4.67; N, 29.52. Found: C, 65.90; H, 4.65; N, 29.45.

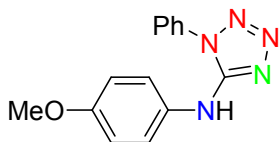

**N-(4-Methoxyphenyl)-1-phenyl-1H-tetrazol-5-amine B**: Analytical TLC on silica gel, 3:7 ethyl acetate/hexane  $R_f = 0.7$ ; yield 80 %;  $^1\text{H NMR}$  (400 MHz,  $\text{CDCl}_3$ )  $\delta$  7.80 (d,  $J = 7.6$  Hz, 2H), 7.54-7.47 (m, 5H), 6.85 (d,  $J = 8.4$  Hz, 2H), 6.02 (br s, 1NH), 3.77 (s, 3H);  $^{13}\text{C NMR}$  (100 MHz,  $\text{CDCl}_3$ )  $\delta$  154.7, 142.9, 133.7, 132.6, 129.7, 129.5, 129.3, 126.1, 121.4, 55.0; FT-IR (KBr)



3426, 3082, 2900, 1657, 1612, 1586, 1514, 1448, 1325, 1216, 1145, 1099, 829  $\text{cm}^{-1}$ . Anal. Calcd. for  $\text{C}_{14}\text{H}_{13}\text{N}_5\text{O}$ : C, 62.91; H, 4.90; N, 26.20; O, 5.99. Found: C, 63.05; H, 4.88; N, 26.14.

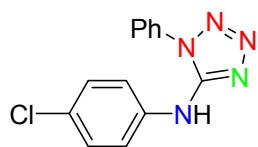

**N-(4-Chlorophenyl)-1-phenyl-1H-tetrazol-5-amine C:** Analytical TLC on silica gel, 3:7 ethyl acetate/hexane  $R_f = 0.7$ ; yield 82 %;  $^1\text{H}$  NMR (400 MHz,  $\text{CDCl}_3$ )  $\delta$  7.77-7.48 (m, 4H), 7.25 (d,  $J = 6.8$  Hz, 3H), 7.16 (d,  $J = 8.8$  Hz, 2H), 5.96 (br s, 1NH);  $^{13}\text{C}$  NMR (100 MHz,  $\text{CDCl}_3$ )  $\delta$  141.7, 137.0, 132.3, 128.3, 128.1, 127.8, 127.0, 124.7, 118.1; FT-IR (KBr) 3420, 3090, 1645, 1601, 1590, 1489, 1125, 1036, 941, 854, 788, 612  $\text{cm}^{-1}$ . Anal. Calcd. for  $\text{C}_{13}\text{H}_{10}\text{ClN}_5$ : C, 57.47; H, 3.71; Cl, 13.05; N, 25.78. Found: C, 57.62; H, 3.69; N, 25.72.

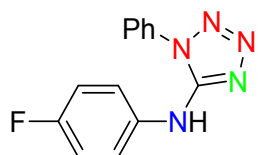

**N-(4-Fluorophenyl)-1-phenyl-1H-tetrazol-5-amine D:** Analytical TLC on silica gel, 3:7 ethyl acetate/hexane  $R_f = 0.7$ ; yield 85 %;  $^1\text{H}$  NMR (400 MHz,  $\text{CDCl}_3$ )  $\delta$  7.64-7.33 (m, 7H), 7.12 (d,  $J = 8$  Hz, 2H), 5.98 (br s, 1H, 1NH);  $^{13}\text{C}$  NMR (100 MHz,  $\text{CDCl}_3$ )  $\delta$  152.0, 142.1, 134.7, 133.0, 128.6, 128.5, 120.6, 119.3, 114.3, 114.0; FT-IR (KBr) 3389, 3088, 1693, 1612, 1543, 1489, 1421, 1400, 1239, 1121, 1070, 927,  $\text{cm}^{-1}$ . Anal. Calcd. for  $\text{C}_{13}\text{H}_{10}\text{FN}_5$ : C, 61.17; H, 3.95; F, 7.44; N, 27.44. Found: C, 61.32; H, 3.93; N, 27.37.

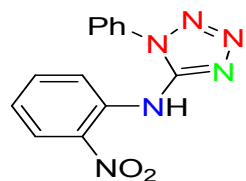

**N-(2-Nitrophenyl)-1-phenyl-1H-tetrazol-5-amine E:** Analytical TLC on silica gel, 3:7 ethyl acetate/hexane  $R_f = 0.7$ ; yield 70 %;  $^1\text{H}$  NMR (400 MHz,  $\text{CDCl}_3$ )  $\delta$  8.92 (br s, 1NH), 8.09-8.06 (m, 2H), 8.05-7.76 (m, 2H), 7.74 (d,  $J = 2$  Hz, 2H), 7.05 (d,  $J = 7.2$  Hz, 3H);  $^{13}\text{C}$  NMR (100 MHz,  $\text{CDCl}_3$ )  $\delta$  152.8, 146.3, 143.8, 141.8, 137.3, 129.6, 127.1, 125.6, 121.0, 120.7, 118.0; FT-IR

(KBr) 3417, 3087, 1667, 1654, 1612, 1567, 1521, 1458, 1394, 1332, 1265, 1104, 1080, 941  $\text{cm}^{-1}$ .  
Anal. Calcd. for  $\text{C}_{13}\text{H}_{10}\text{N}_6\text{O}_2$ : C, 55.32; H, 3.57; N, 29.77; O, 11.34. Found: C, 55.49; H, 3.53; N, 29.70.

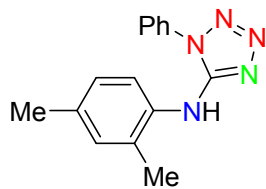

***N*-(2,4-Dimethylphenyl)-1-phenyl-1*H*-tetrazol-5-amine F**: Analytical TLC on silica gel, 3:7 ethyl acetate/hexane  $R_f = 0.7$ ; yield 80 %;  $^1\text{H}$  NMR (400 MHz,  $\text{CDCl}_3$ )  $\delta$  7.68-7.27 (m, 5H), 7.09 (s, 1H), 6.84 (d,  $J = 7.2$  Hz, 2H), 5.90 (br s, 1H, 1NH), 2.47 (s, 3H), 2.34 (s, 3H);  $^{13}\text{C}$  NMR (100 MHz,  $\text{CDCl}_3$ )  $\delta$  143.4, 135.3, 134.8, 134.1, 133.2, 131.4, 130.0, 129.9, 127.1, 125.5, 121.4, 21.0, 20.9; FT-IR (KBr) 3424, 3054, 2896, 2855, 1651, 1602, 1580, 1503, 1358, 1252, 1179, 1056, 1028, 898  $\text{cm}^{-1}$ . Anal. Calcd. for  $\text{C}_8\text{H}_6\text{Br}_2\text{N}_2\text{O}$ : C, 31.41; H, 1.98; N, 9.16; Found: C, 31.55; H, 1.96; N, 9.10.

## References:

1. Ghosh, H.; Yella, R.; Ali, A. R.; Sahoo, S. K.; Patel, B. K. *Tetrahedron Lett.* **2009**, *50*, 2407.
2. Chen, C.-Y.; Wong, F. F.; Huang, J.-J.; Lin, S.-K.; Yeh, M.-Y. *Tetrahedron Lett.* **2008**, *49*, 6505.

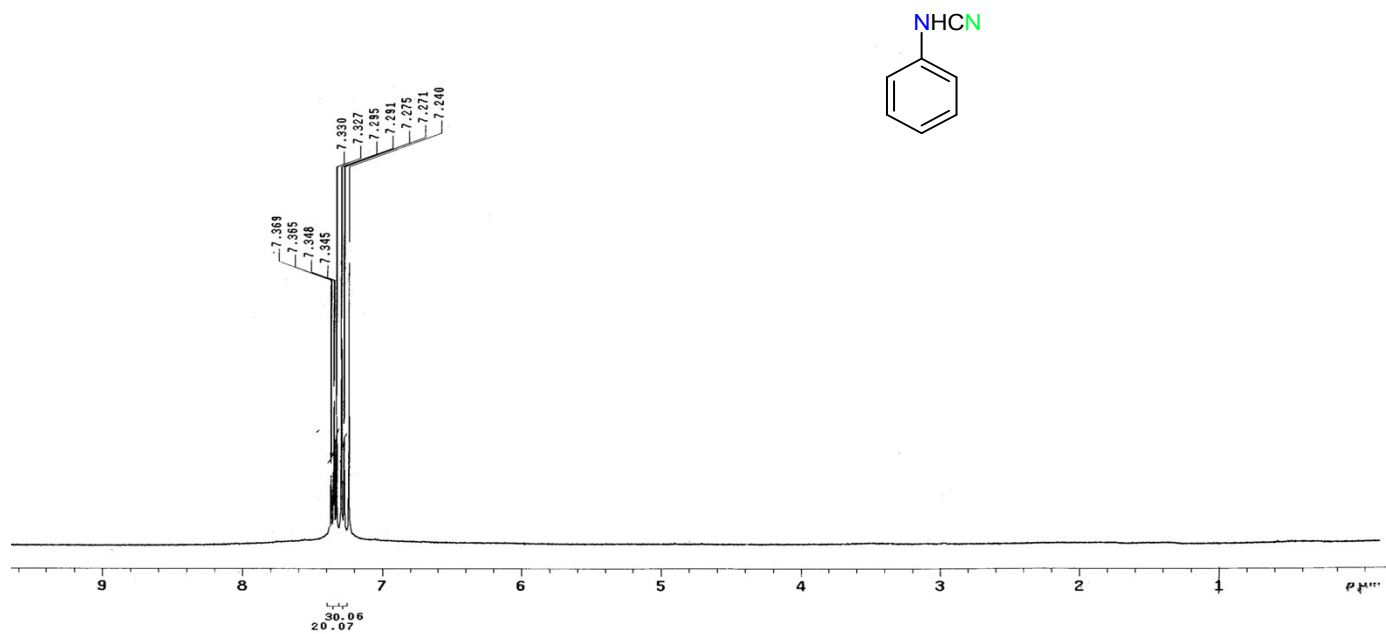

<sup>1</sup>H NMR Spectra of Compound-2a

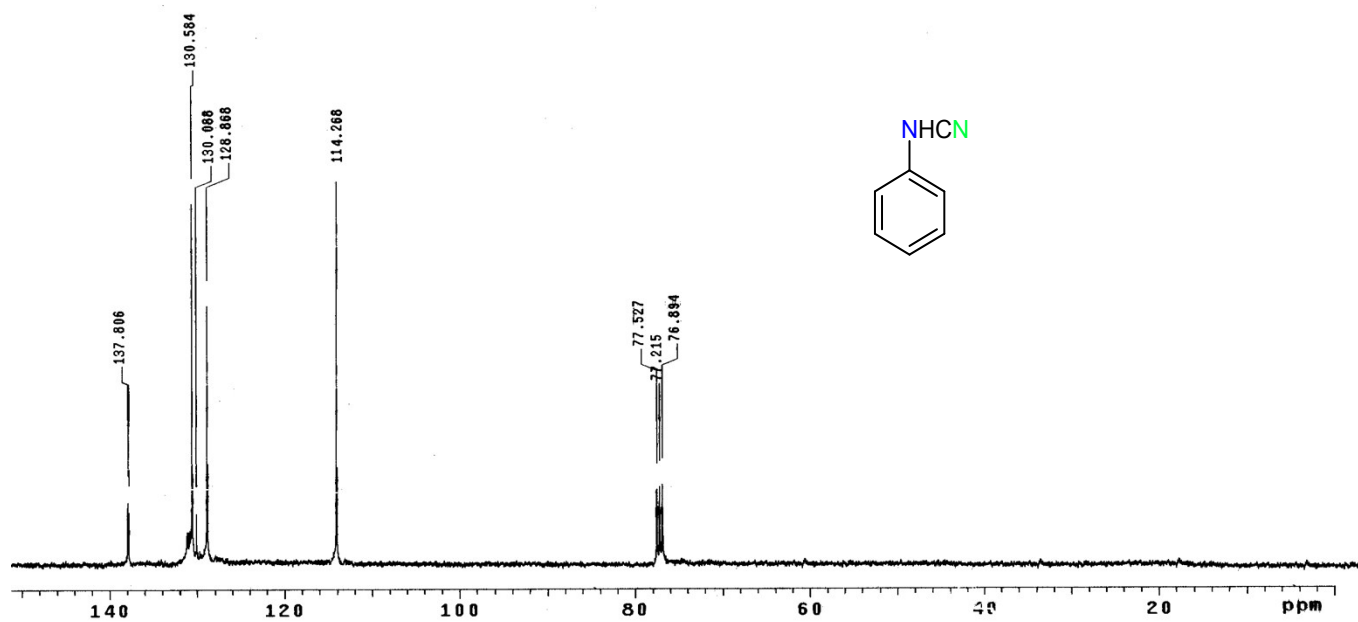

<sup>13</sup>C NMR Spectra of Compound-2a

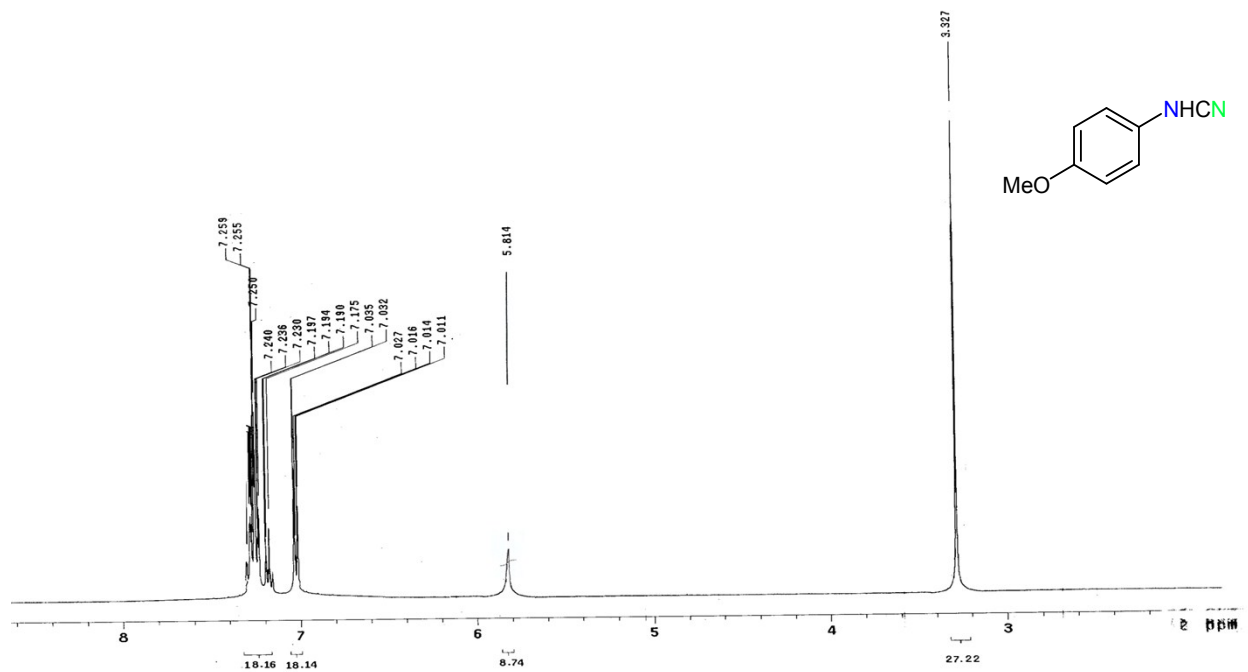

<sup>1</sup>H NMR Spectra of Compound-2b

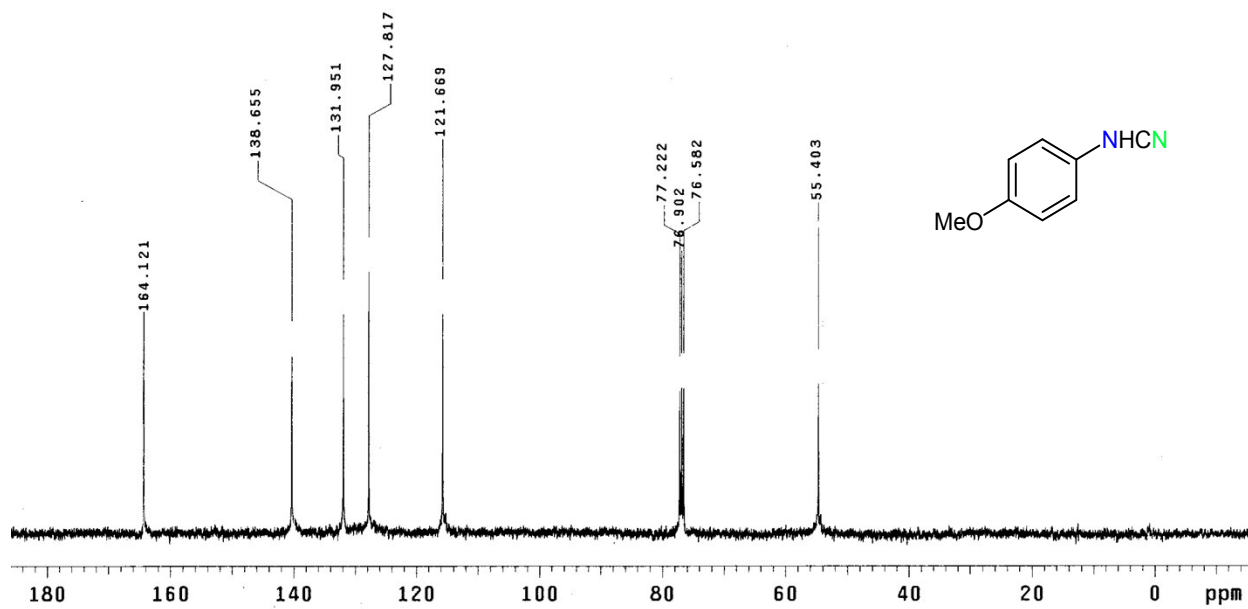

<sup>13</sup>C NMR Spectra of Compound-2b

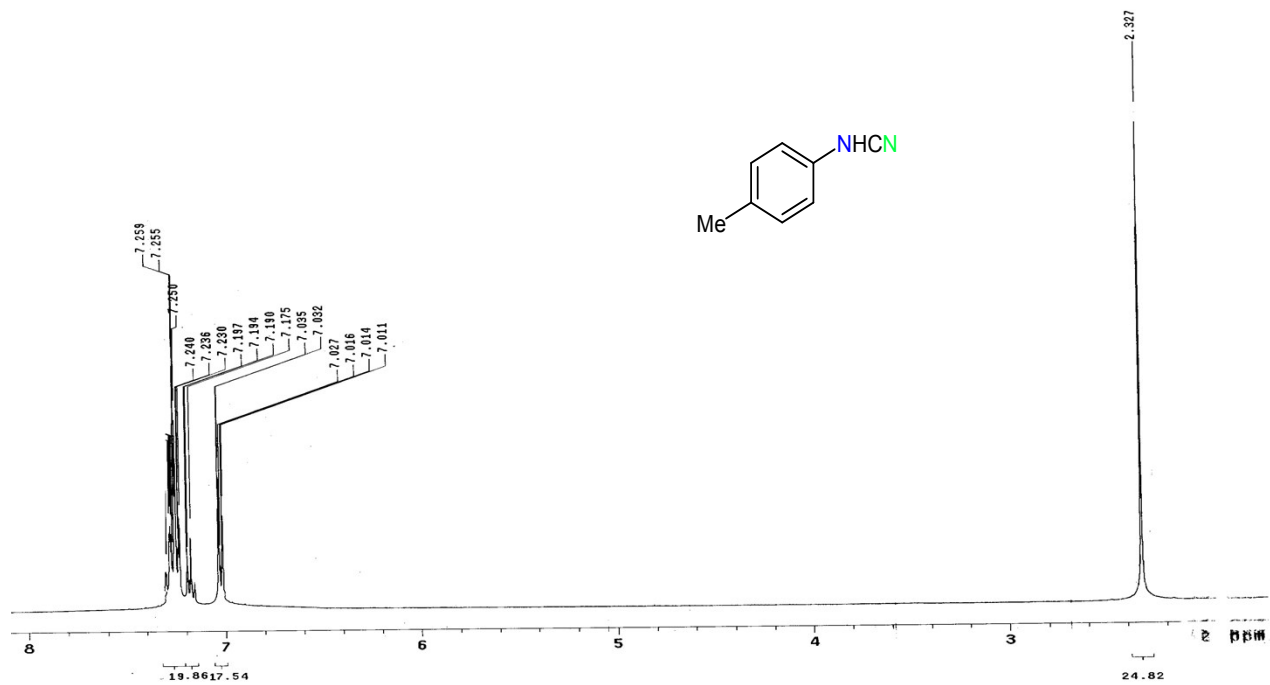

<sup>1</sup>H NMR Spectra of Compound-2c

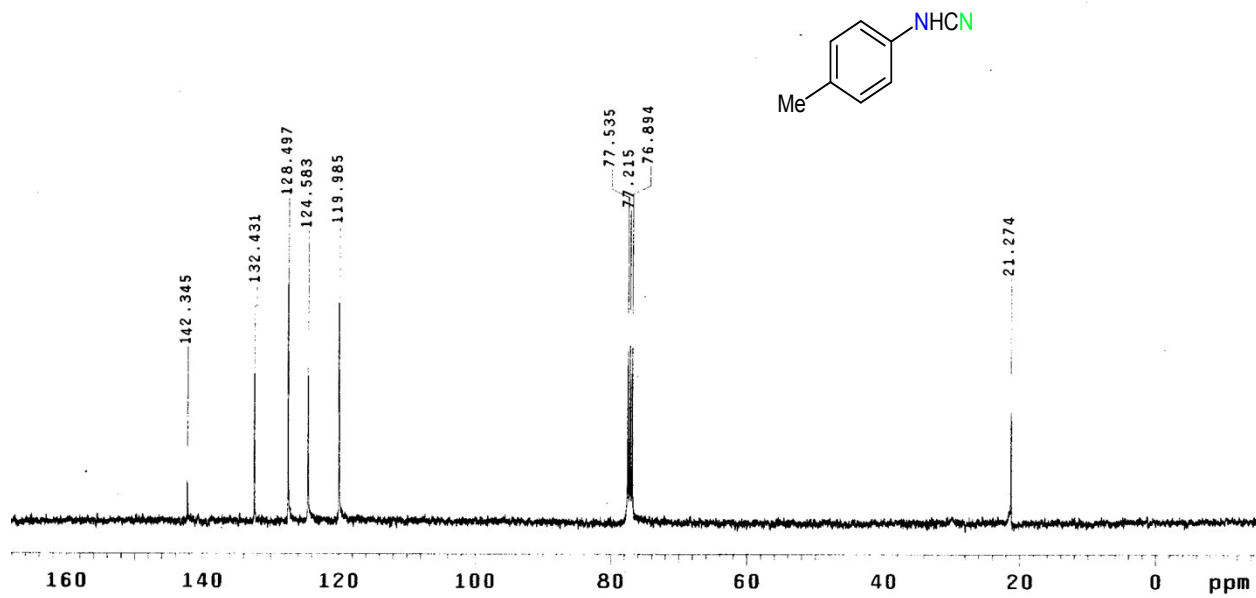

<sup>13</sup>C NMR Spectra of Compound-2c

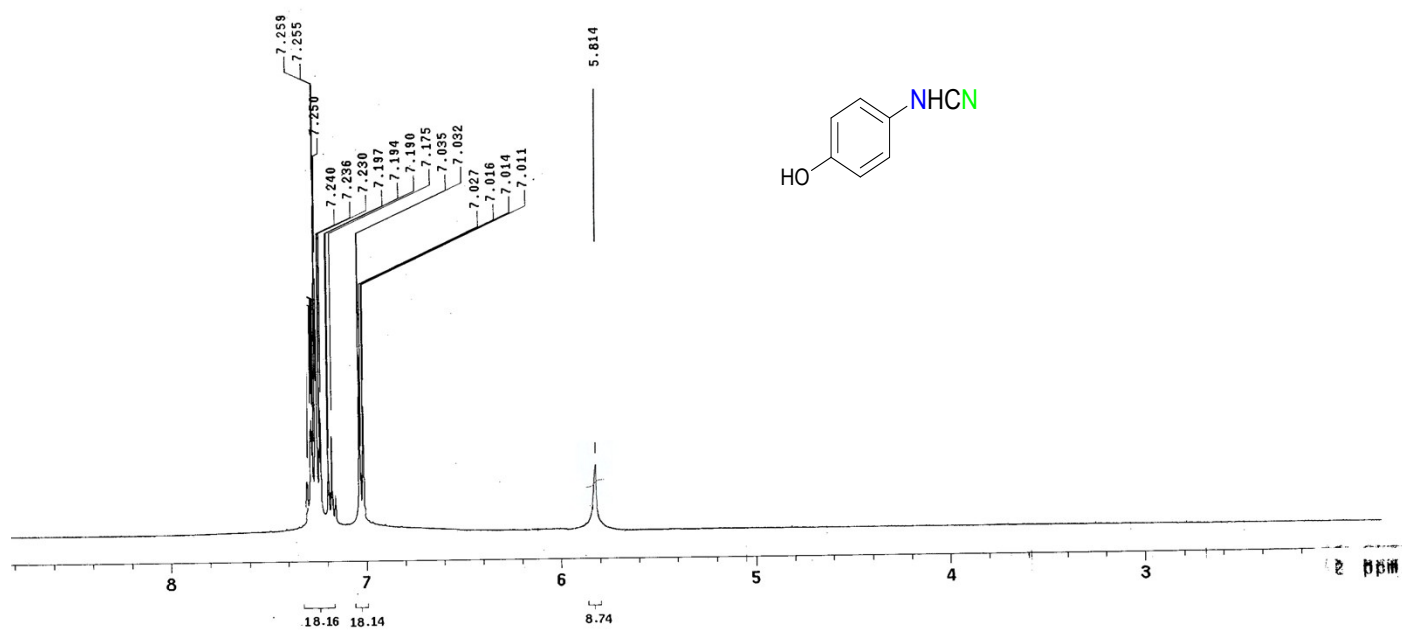

<sup>1</sup>H NMR Spectra of Compound-2d

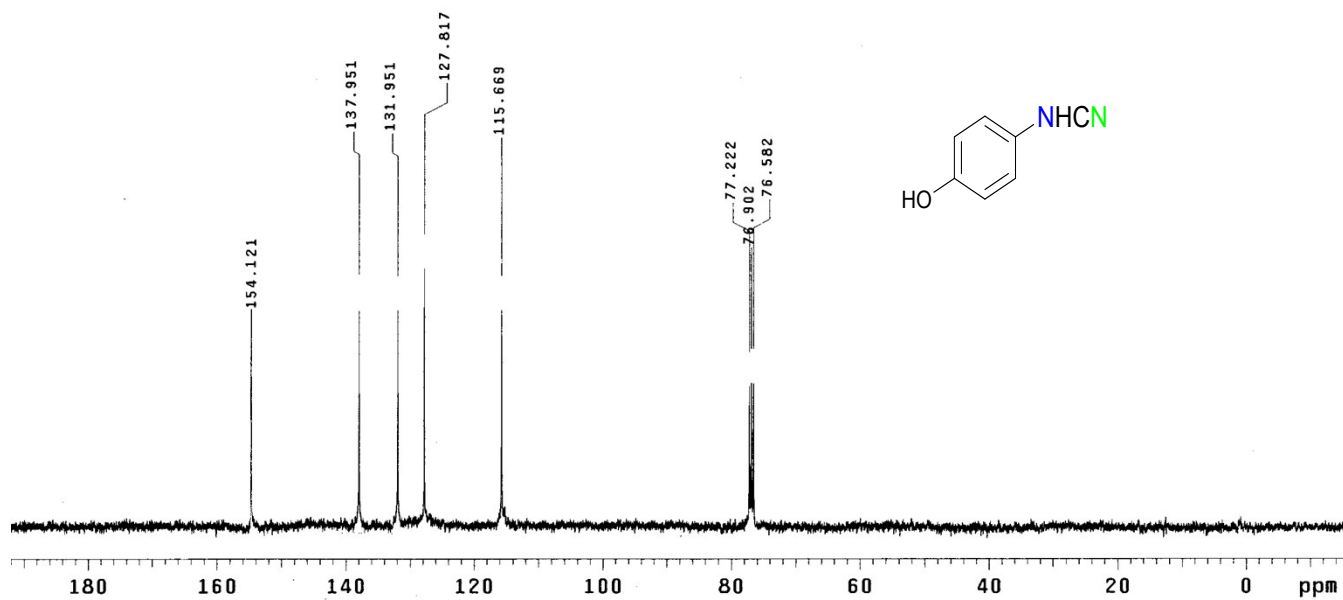

<sup>13</sup>C NMR Spectra of Compound-2d

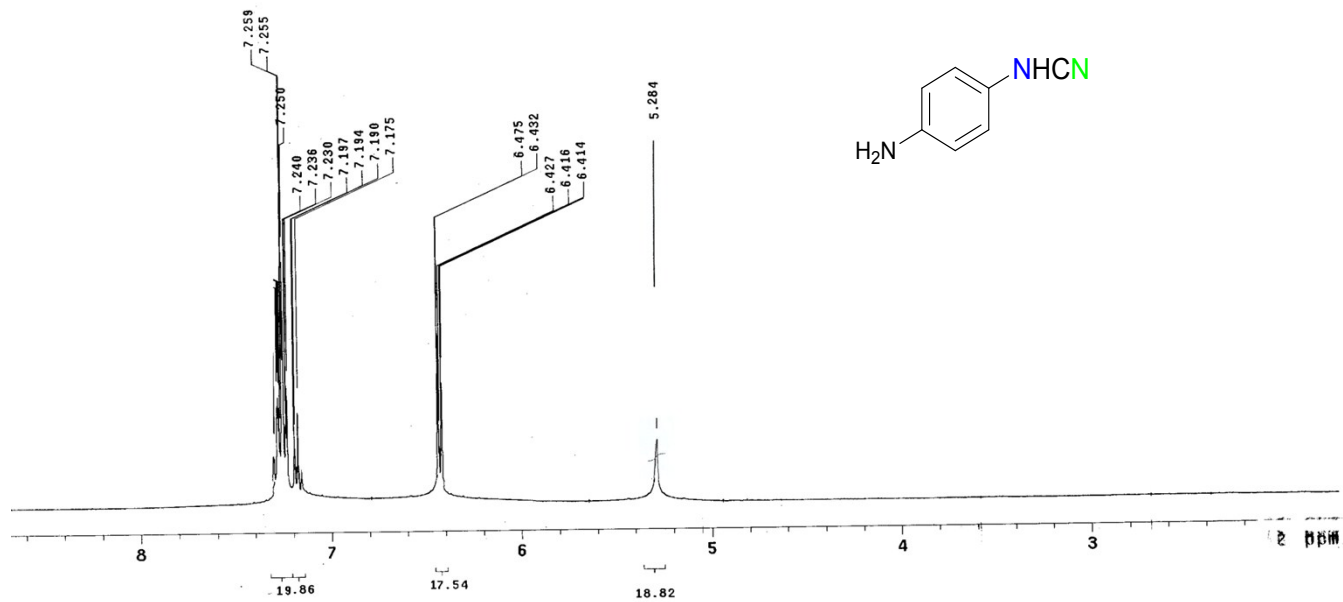

<sup>1</sup>H NMR Spectra of Compound-2e

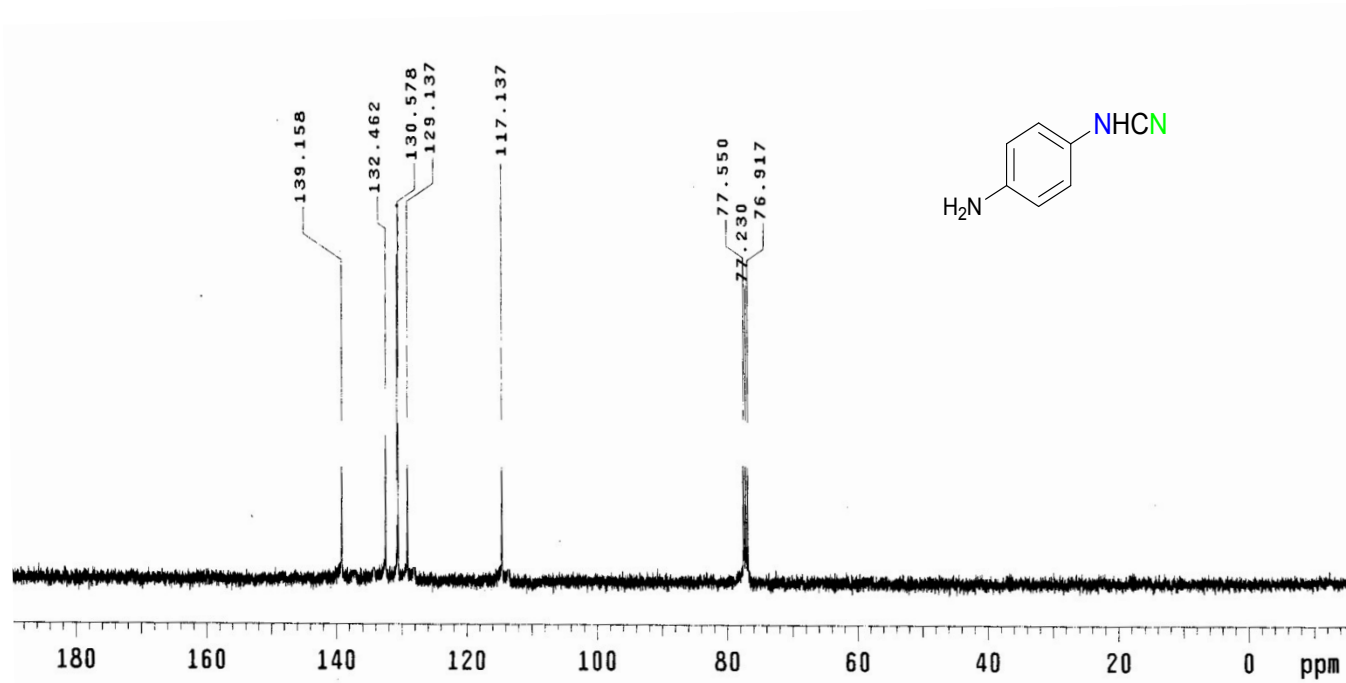

<sup>13</sup>C NMR Spectra of Compound-2e

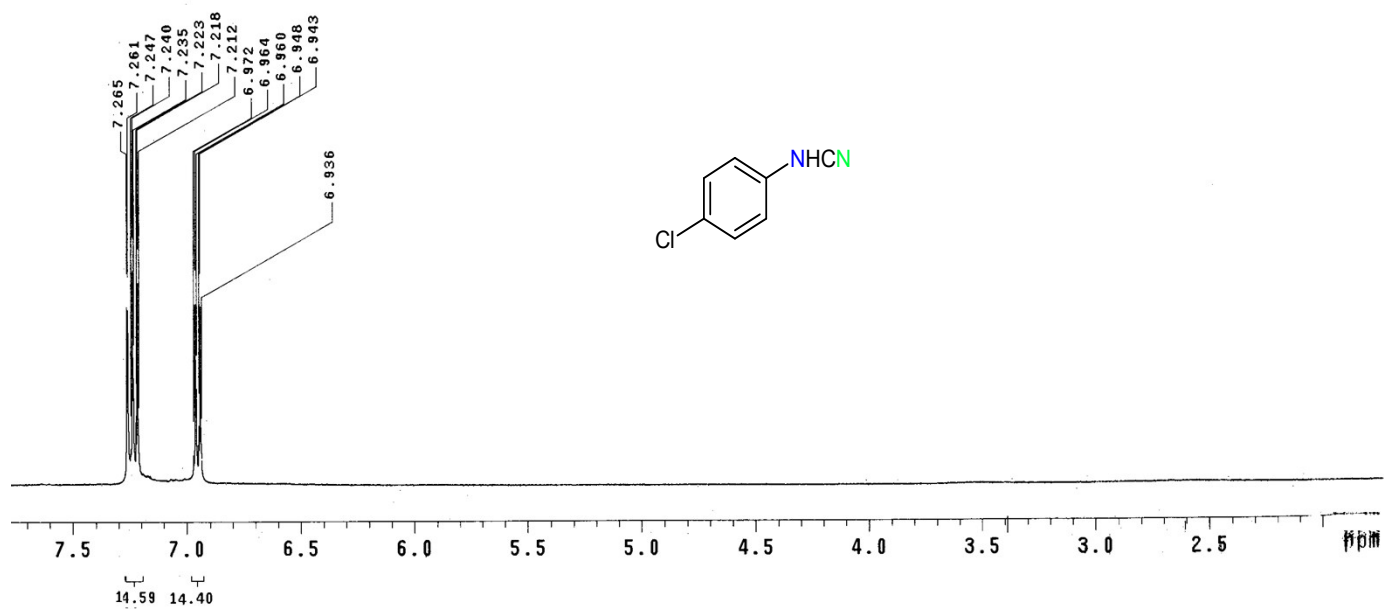

<sup>1</sup>H NMR Spectra of

Compound-2f

<sup>13</sup>C NMR Spectra

of Compound-2f

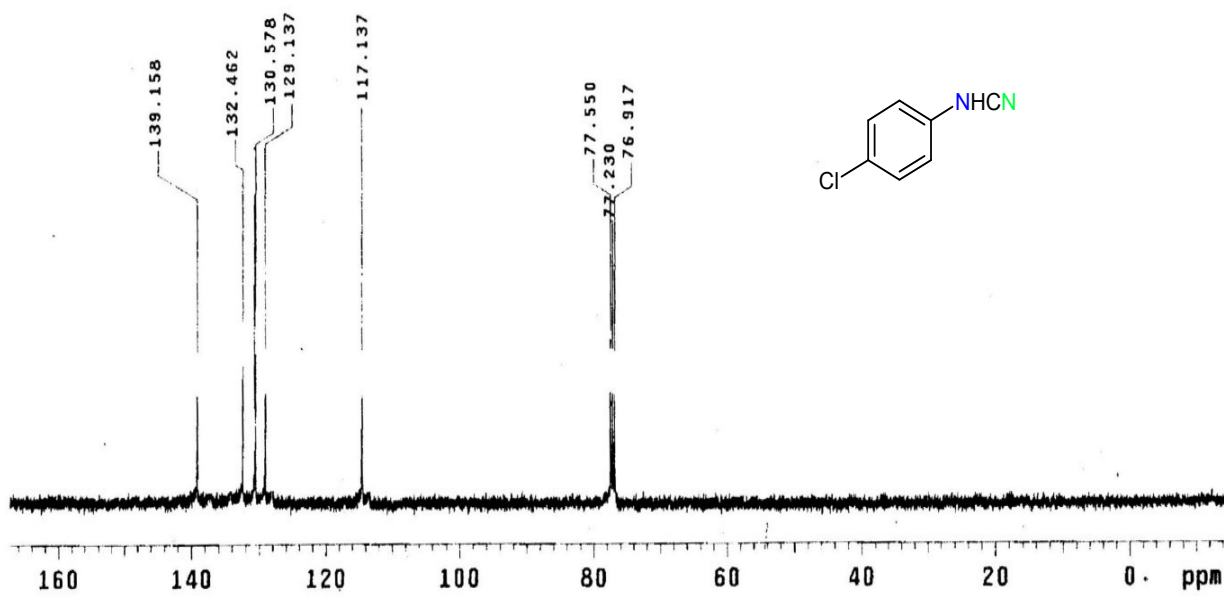

<sup>13</sup>C NMR Spectra of

Compound-2f



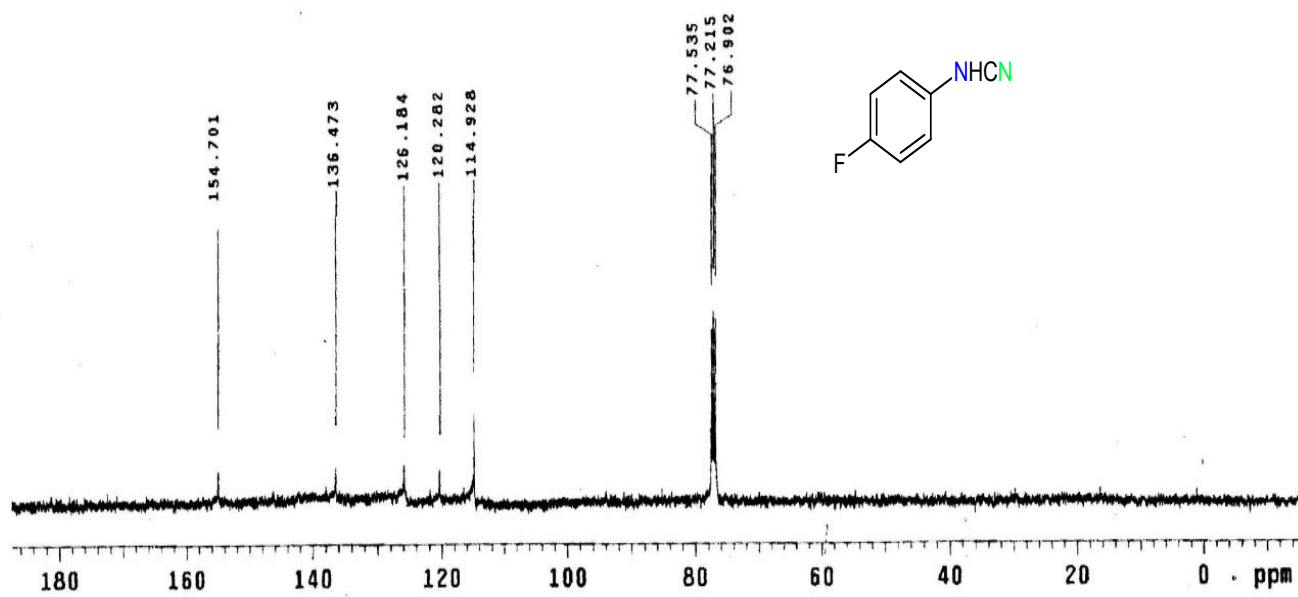

<sup>13</sup>C NMR Spectra of Compound-2g

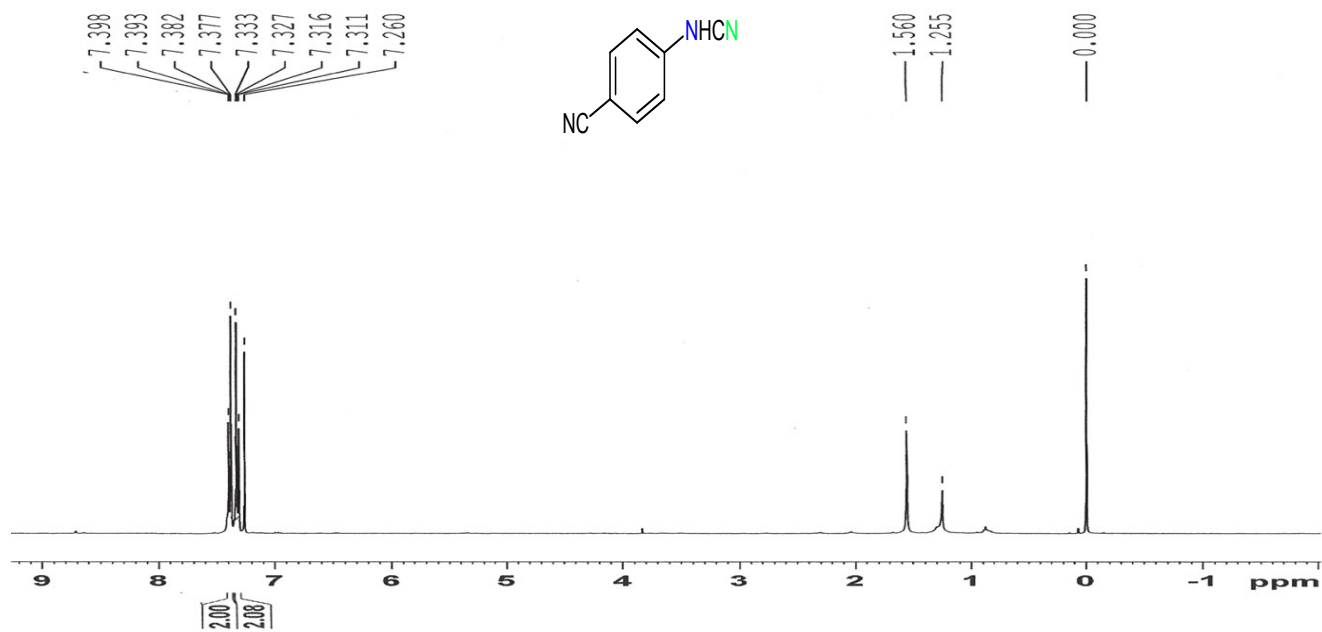

<sup>1</sup>H NMR Spectra of Compound-2h

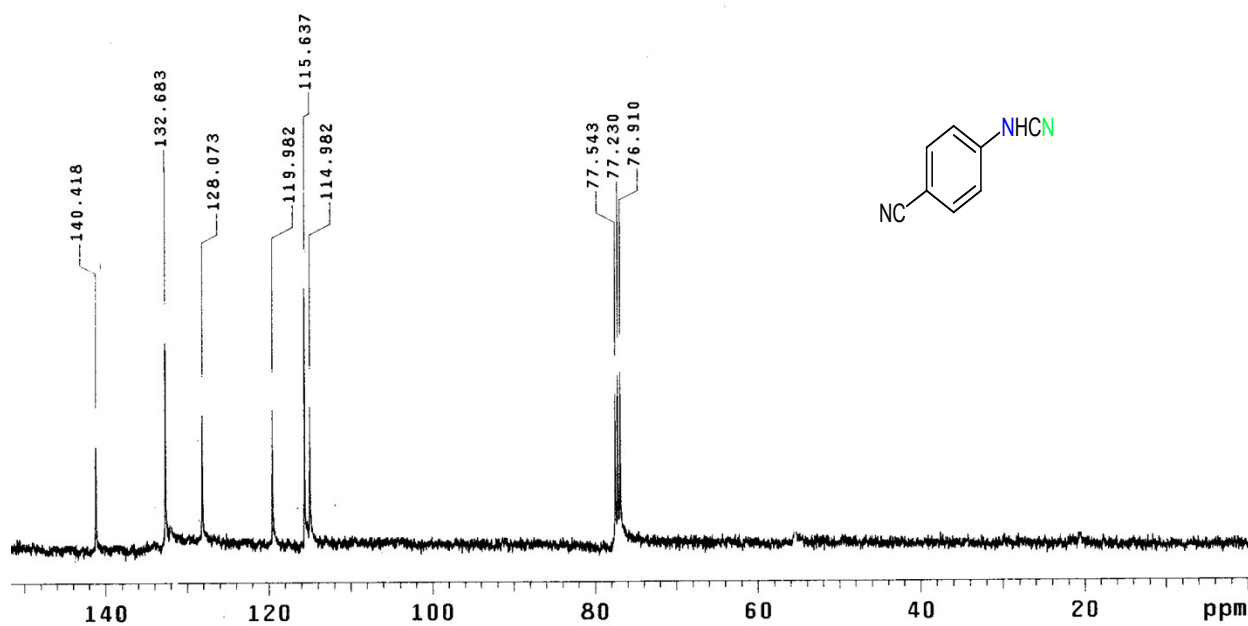

<sup>13</sup>C NMR Spectra of Compound-2h

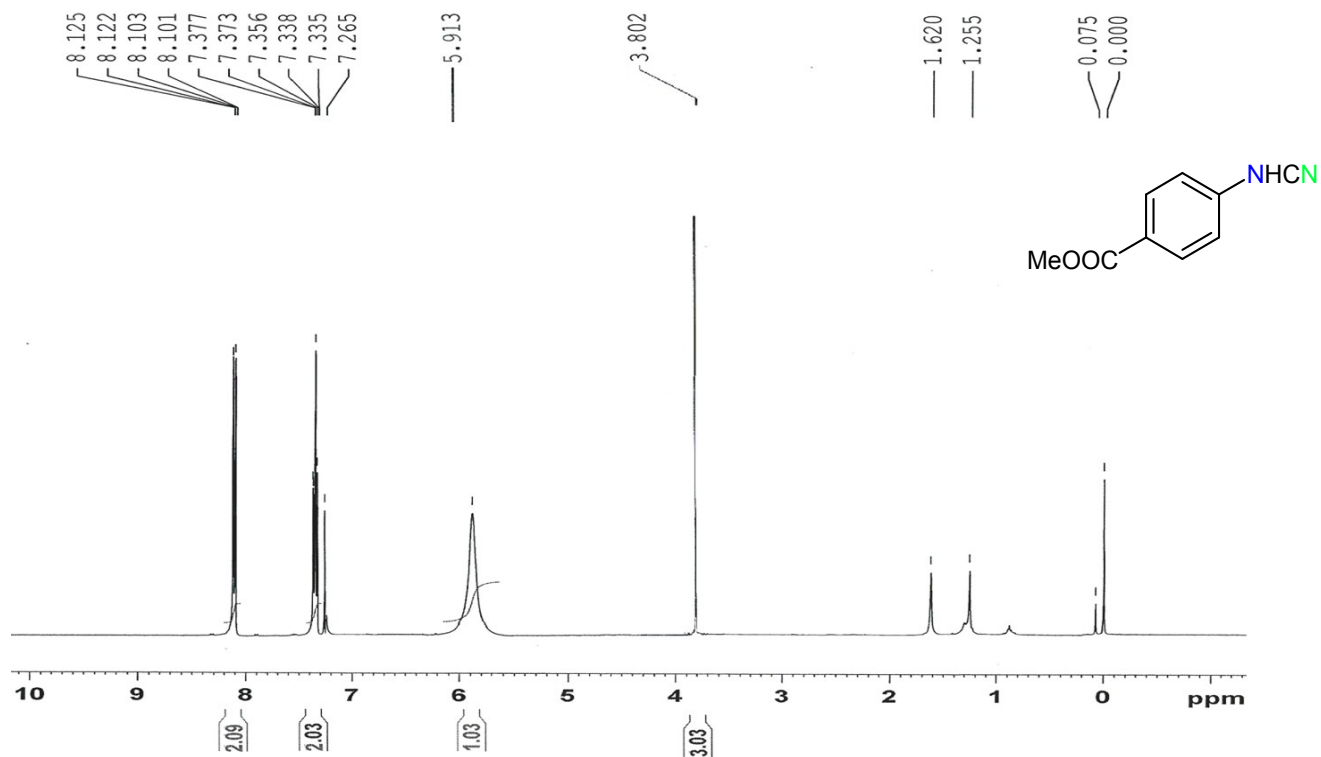

<sup>1</sup>H NMR Spectra of Compound-2i

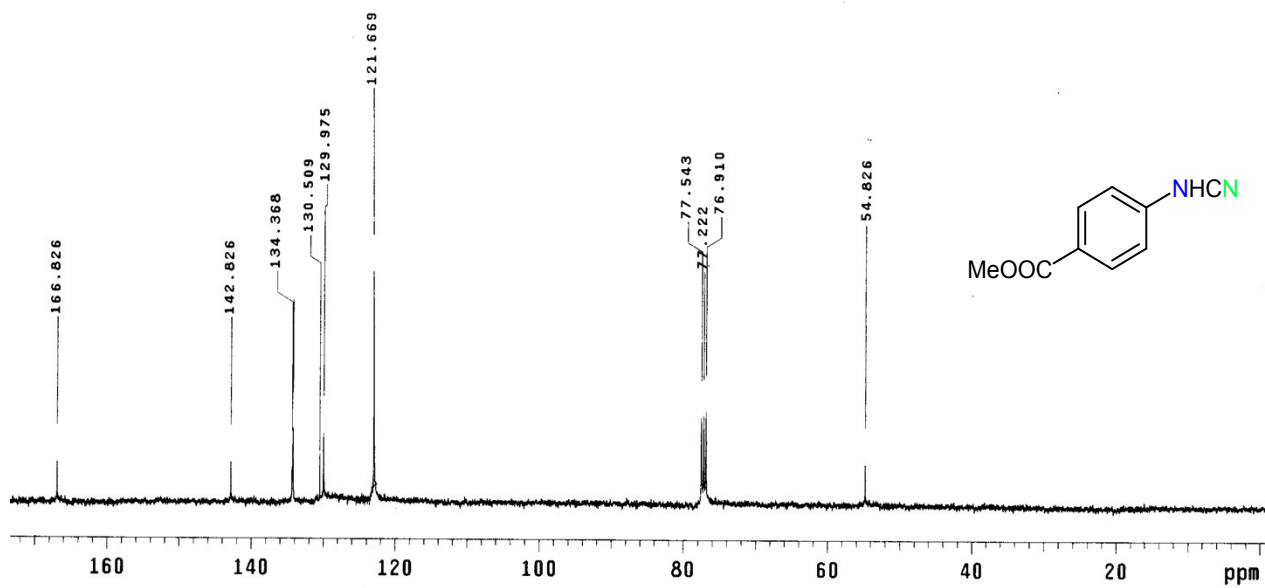

<sup>13</sup>C NMR Spectra of Compound-2i

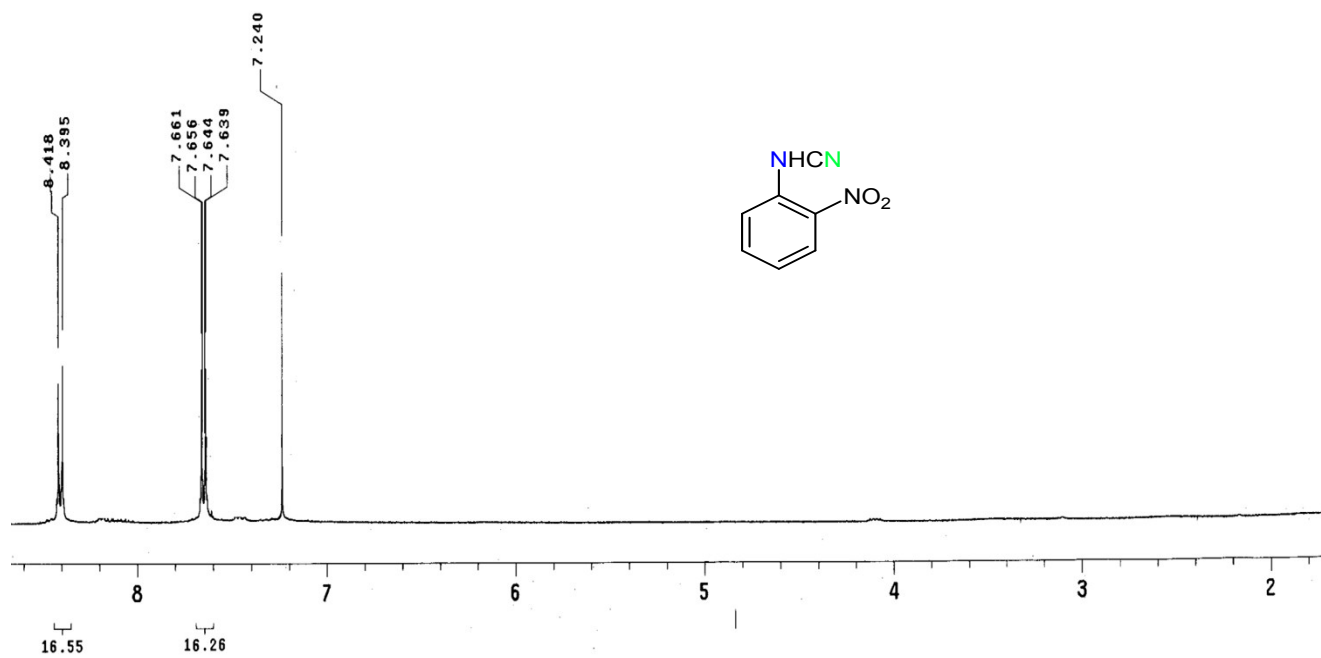

<sup>1</sup>H NMR Spectra of Compound-2j

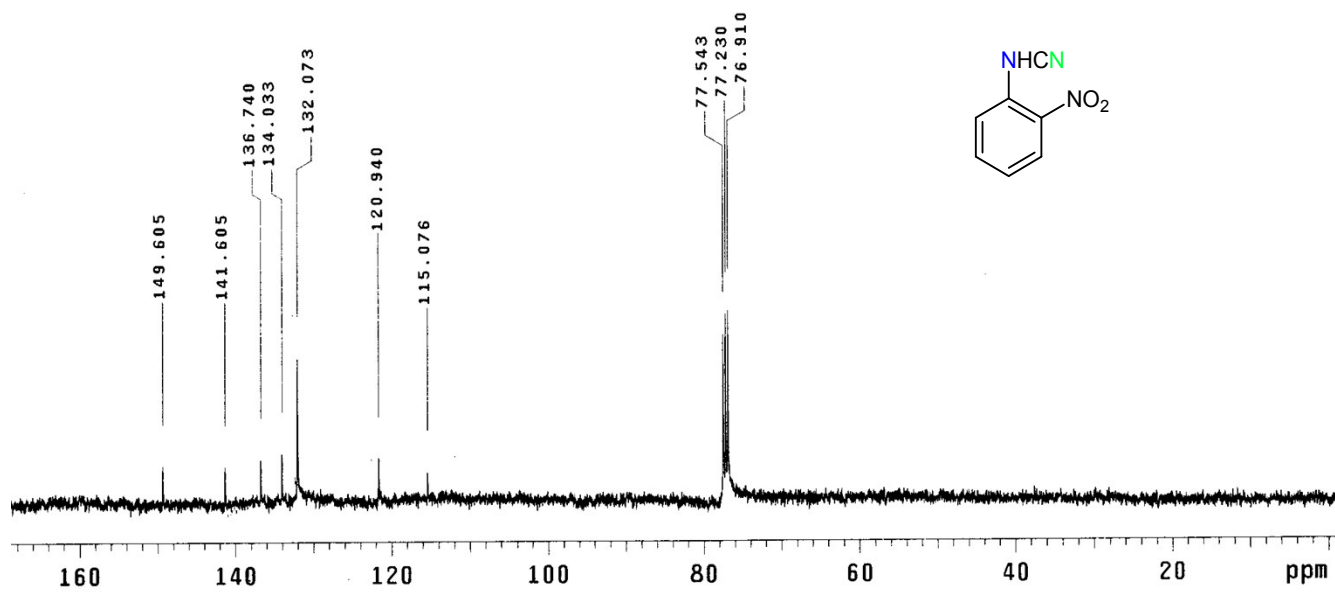

<sup>13</sup>C NMR Spectra of Compound-2j

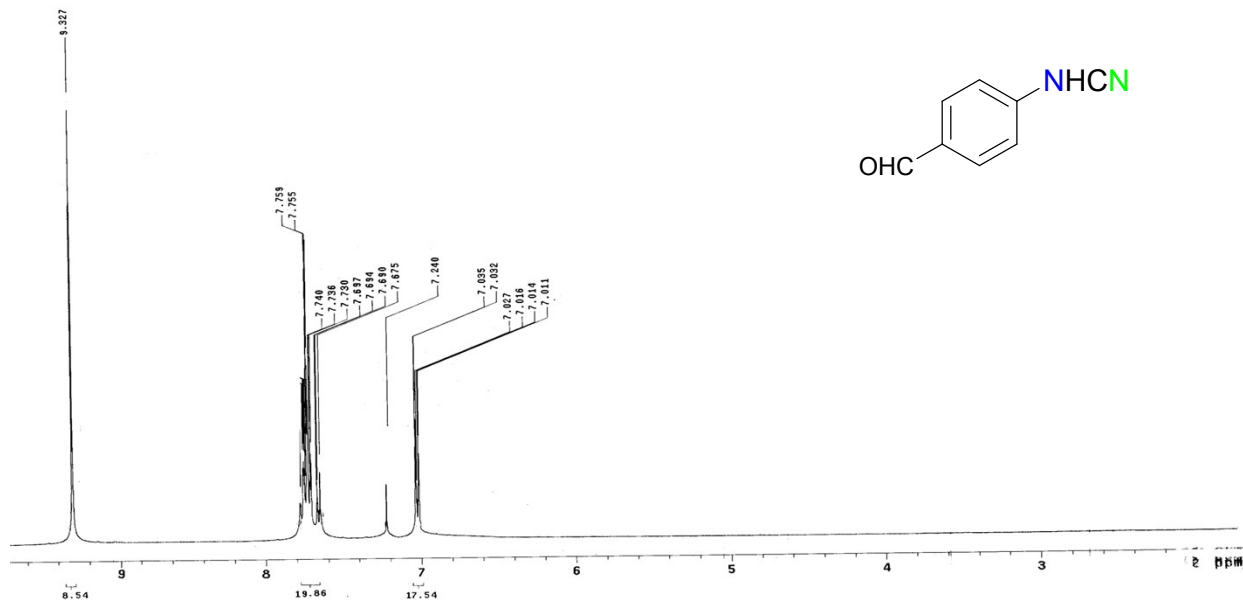

<sup>1</sup>H NMR Spectra of Compound-2k

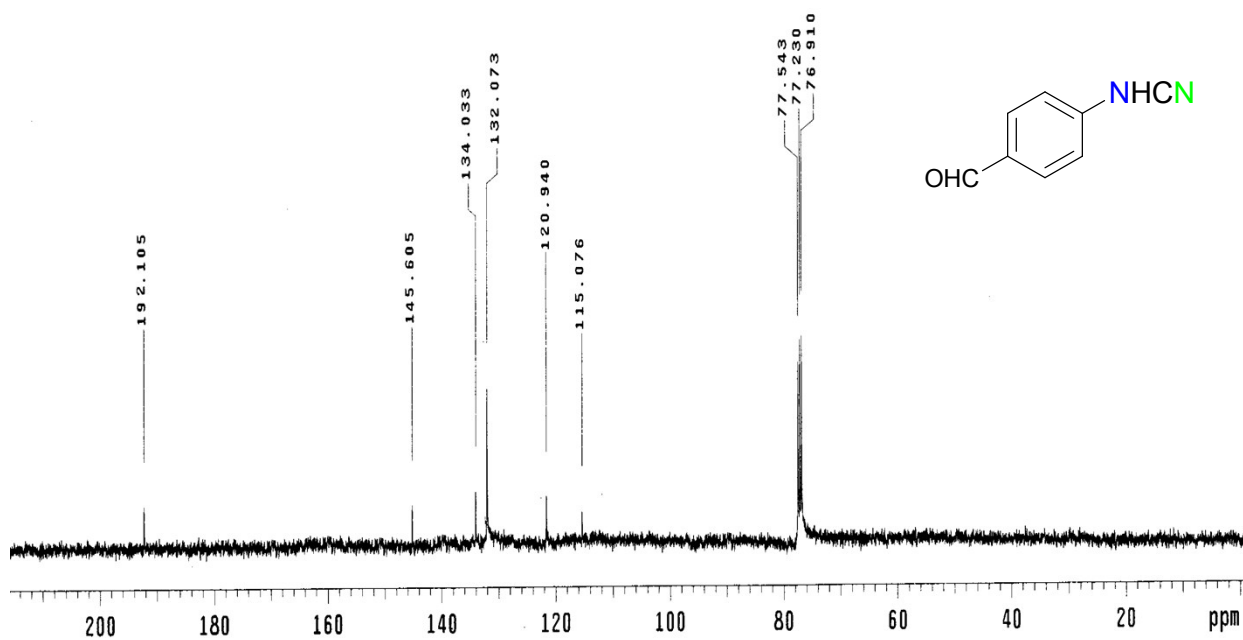

<sup>13</sup>C NMR Spectra of Compound-2k

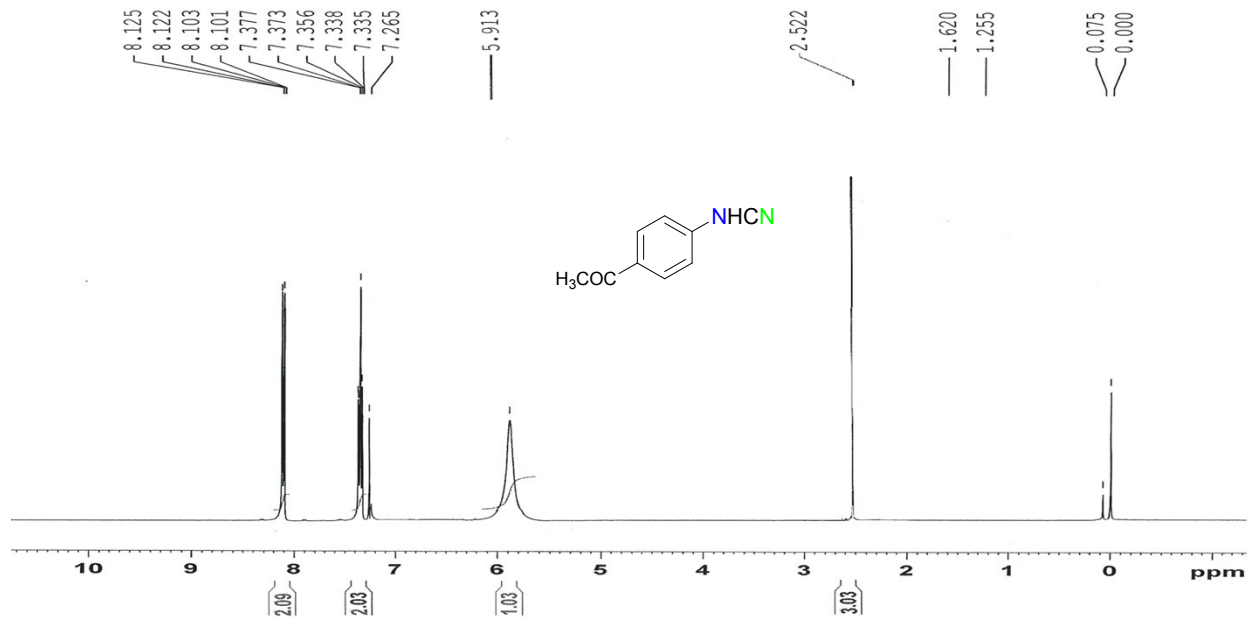

<sup>1</sup>H NMR Spectra of Compound-2I

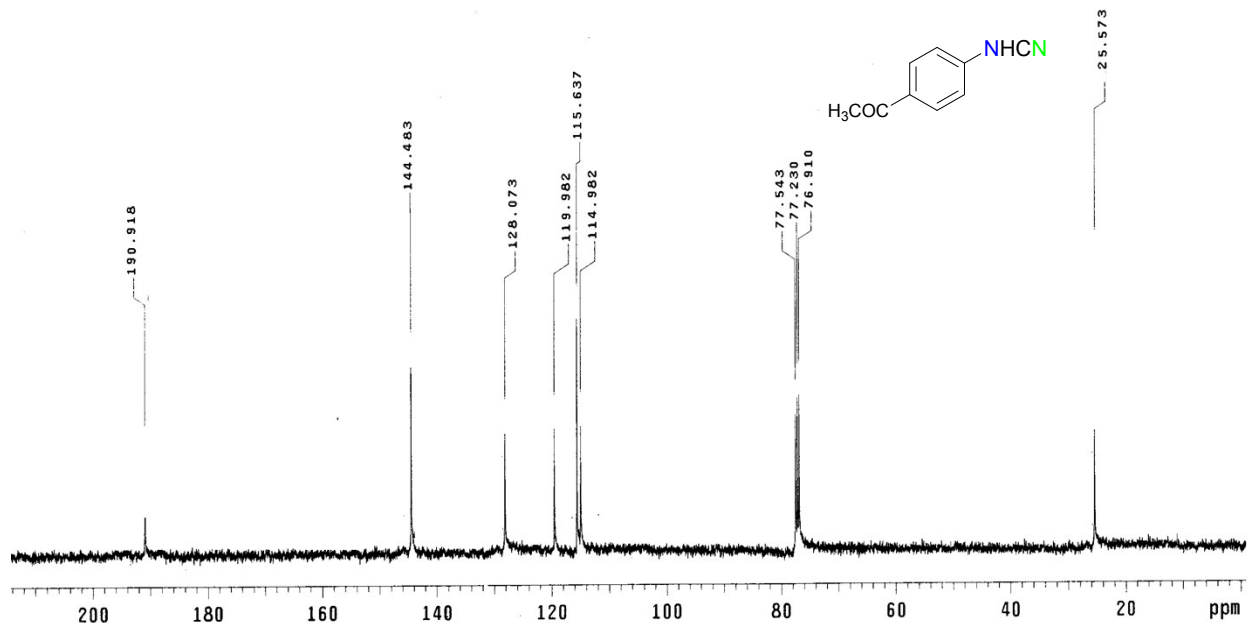

<sup>13</sup>C NMR Spectra of

Compound-21

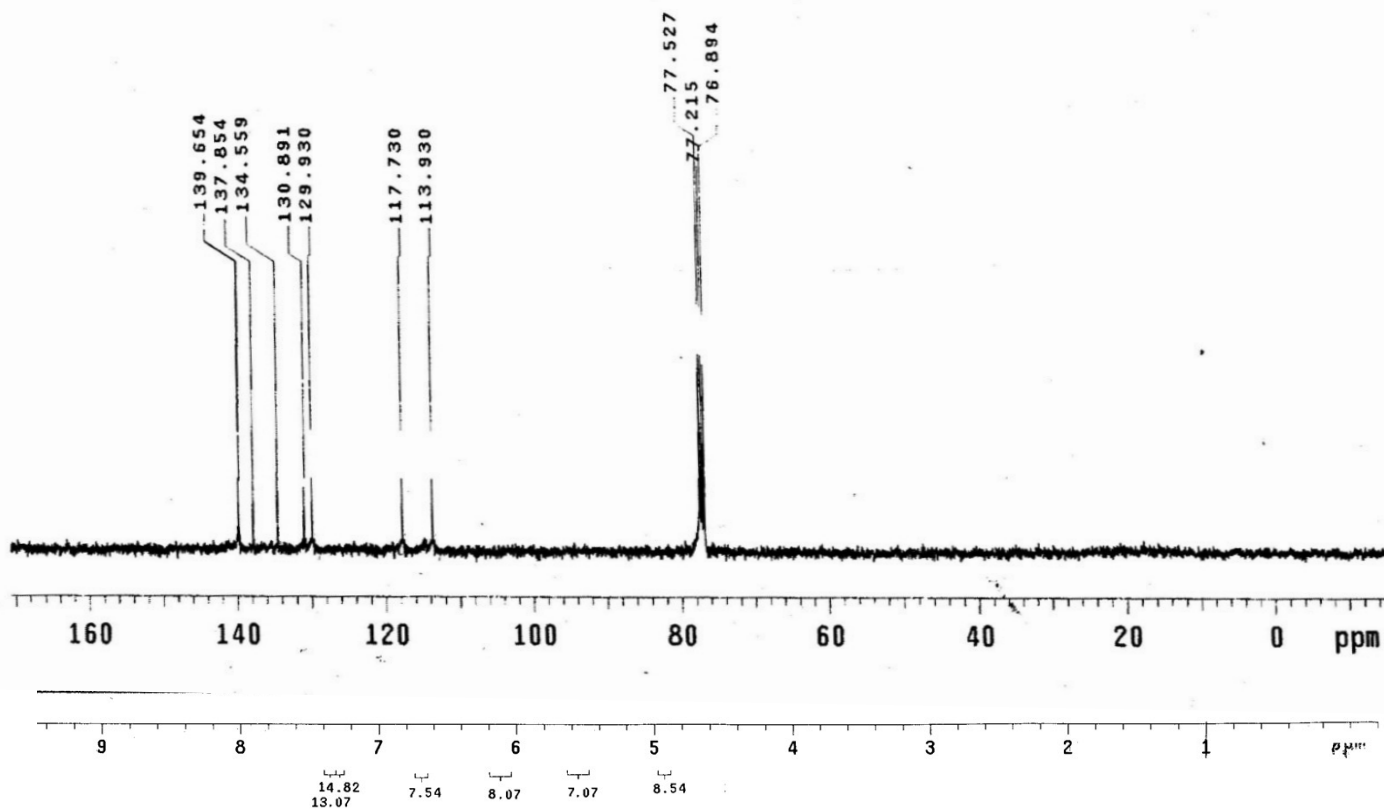

<sup>1</sup>H NMR Spectra of

Compound-2m

<sup>13</sup>C NMR Spectra of Compound-2m

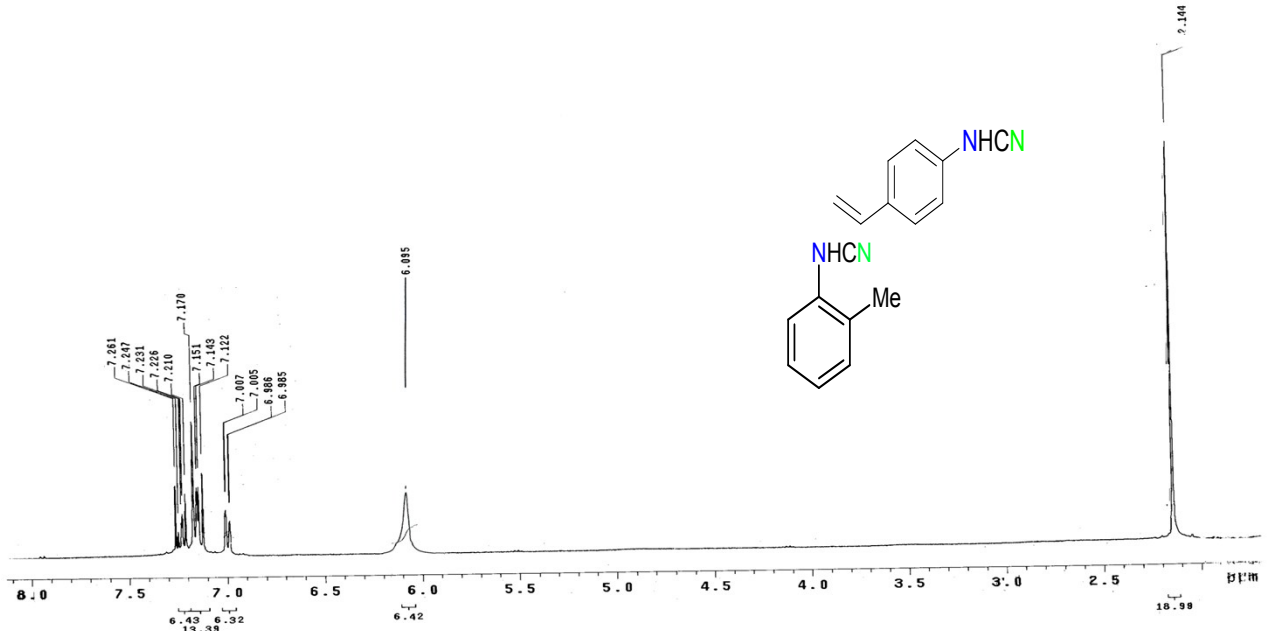

<sup>1</sup>H NMR

Spectra of

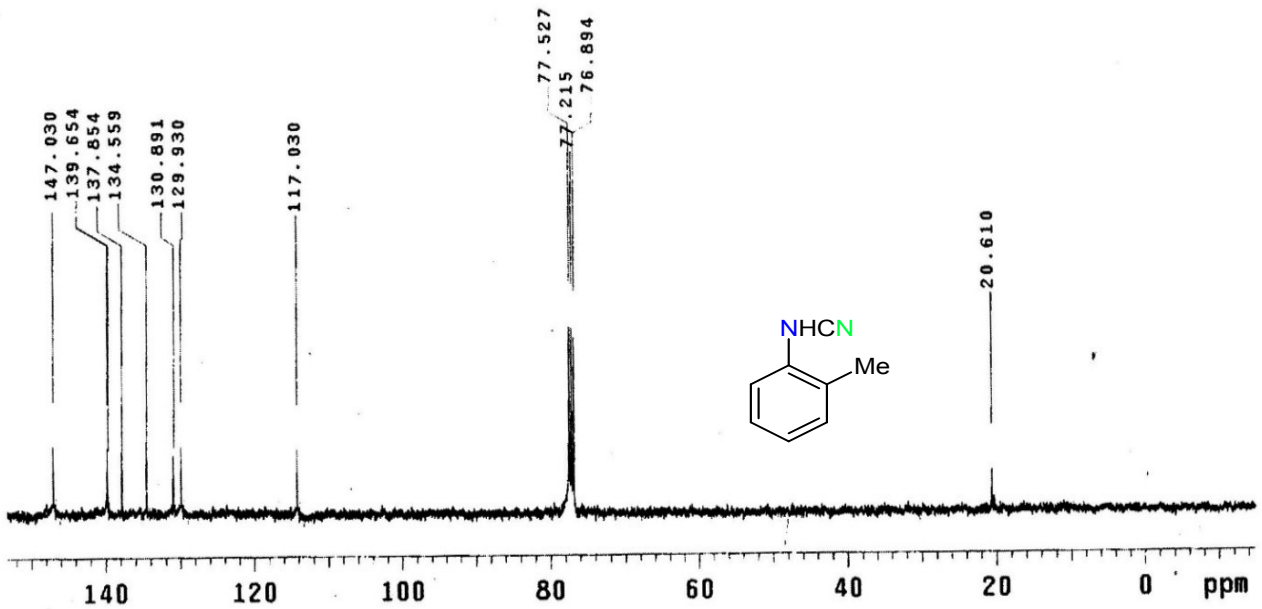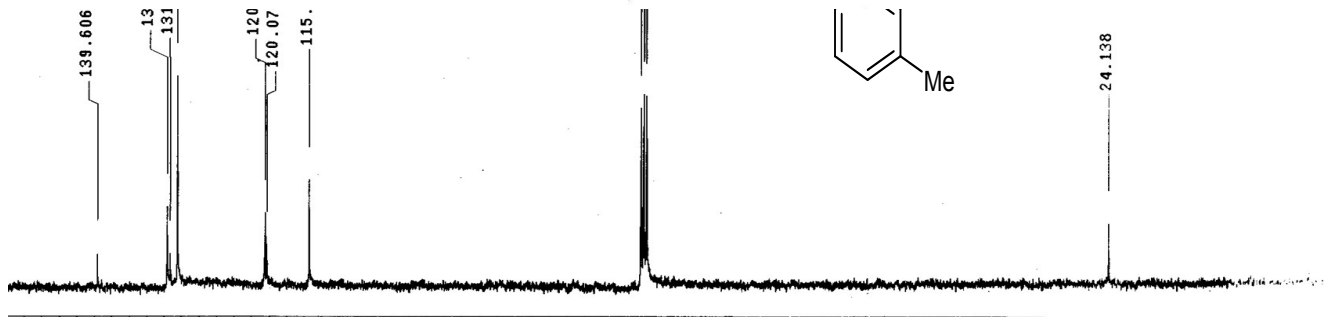



<sup>13</sup>C NMR Spectra of Compound-2p

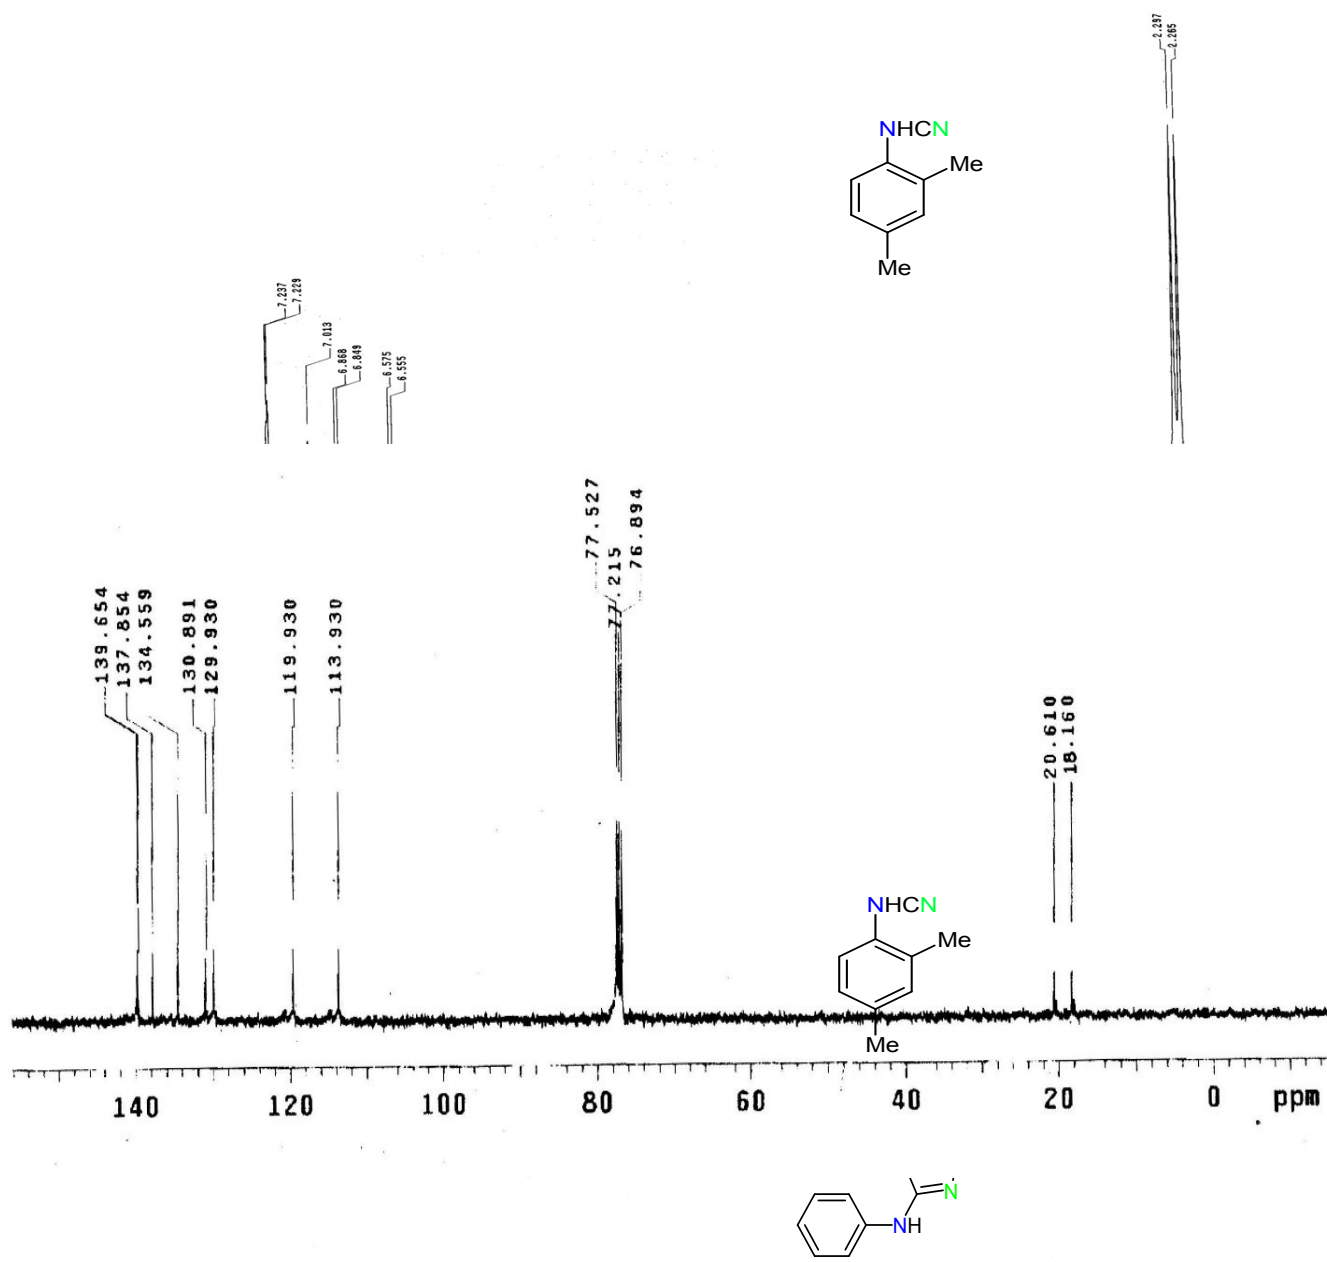

### <sup>1</sup>H NMR Spectra of Compound-A

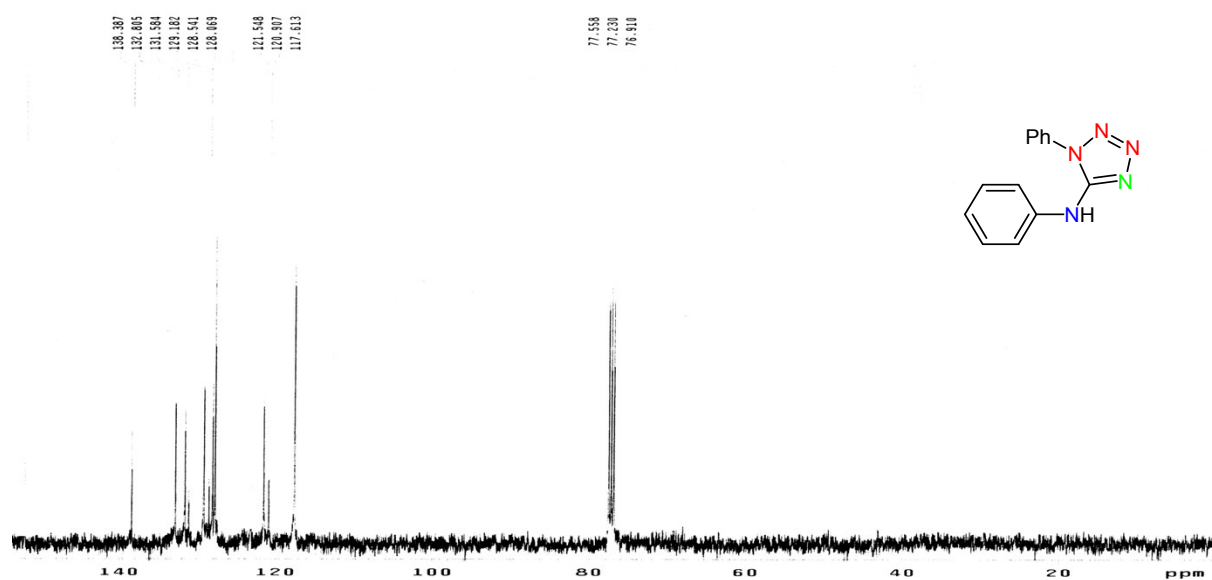

### <sup>13</sup>C NMR Spectra of Compound-A

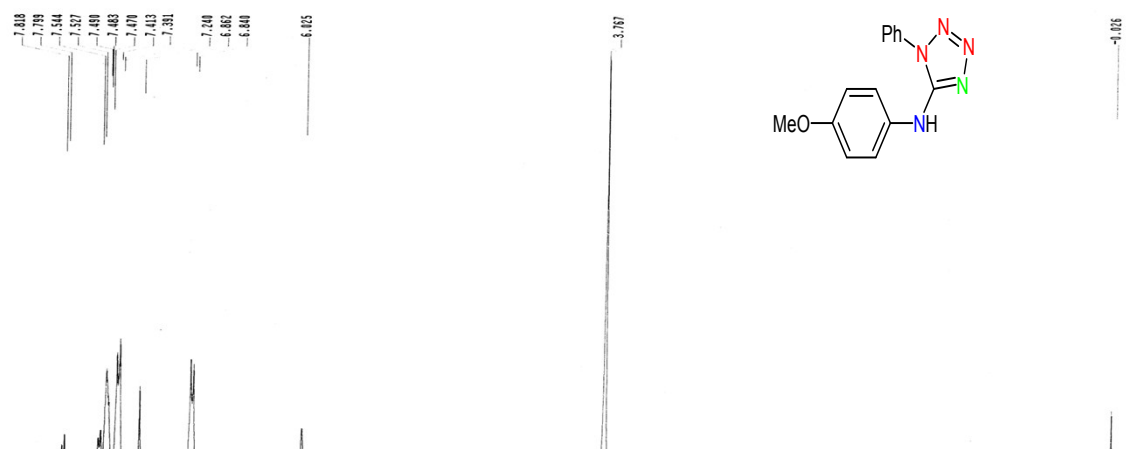

### <sup>1</sup>H NMR Spectra of Compound-B

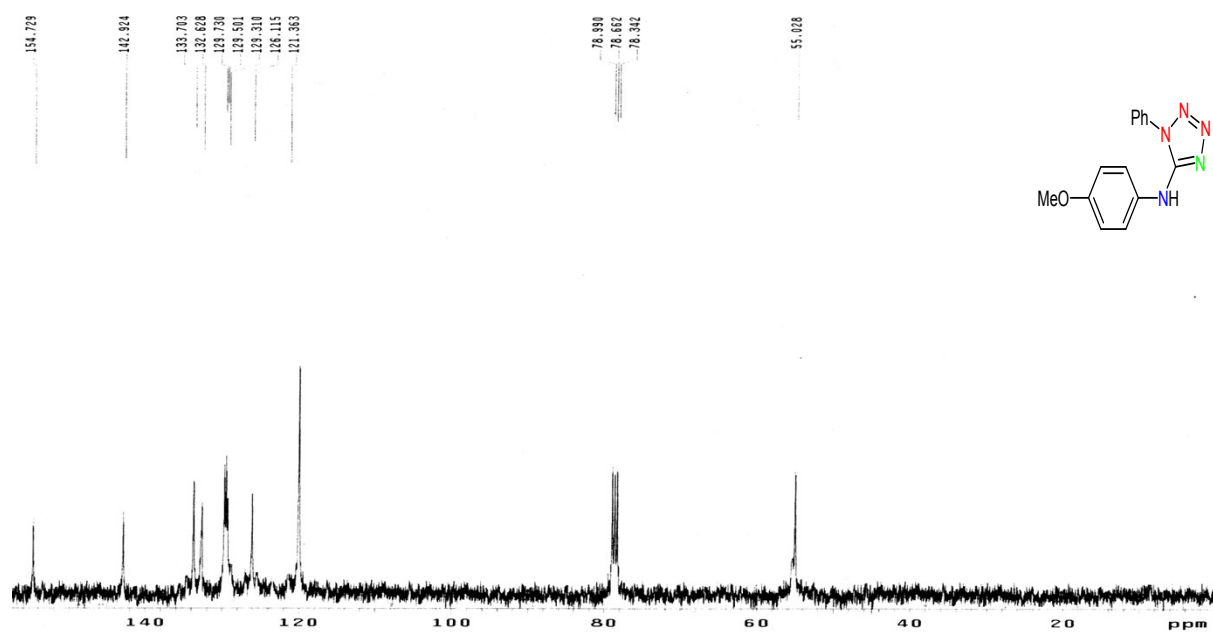

### <sup>13</sup>C NMR Spectra of Compound-B

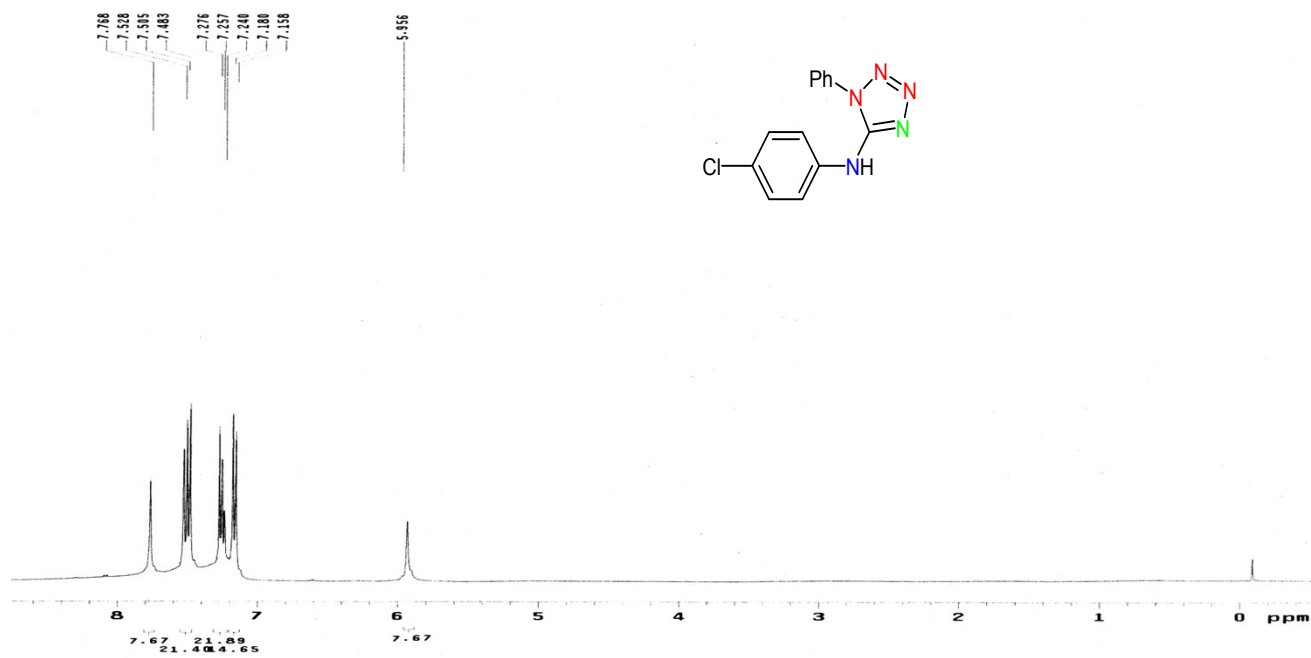

<sup>1</sup>H NMR Spectra of Compound-C

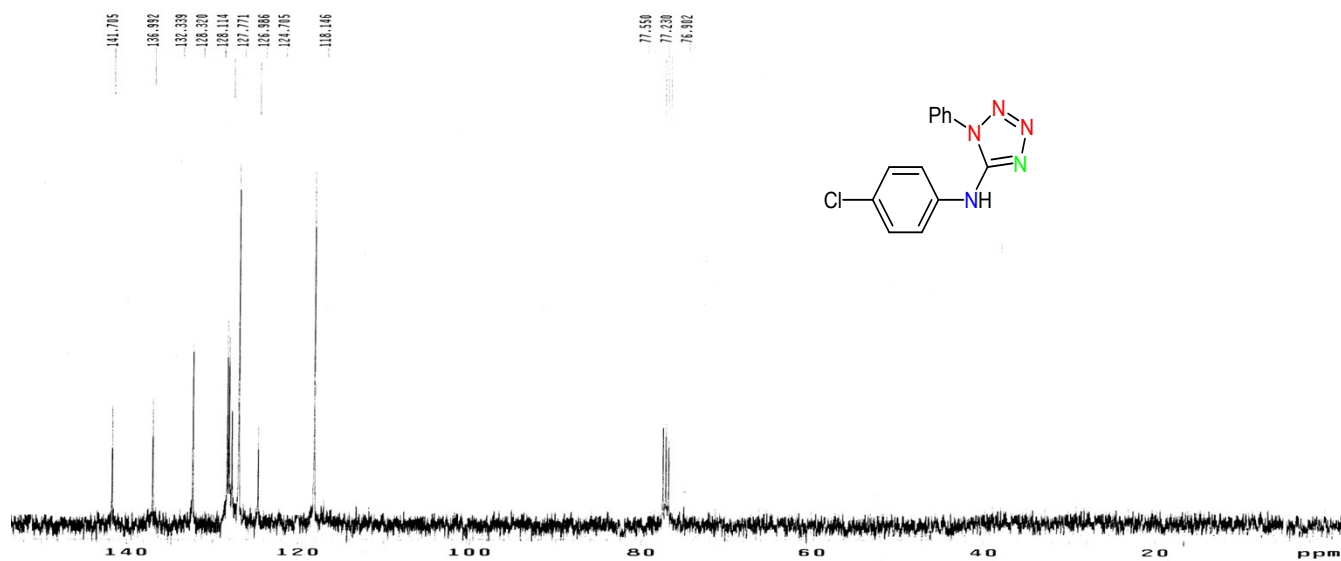

<sup>13</sup>C NMR Spectra of Compound-C

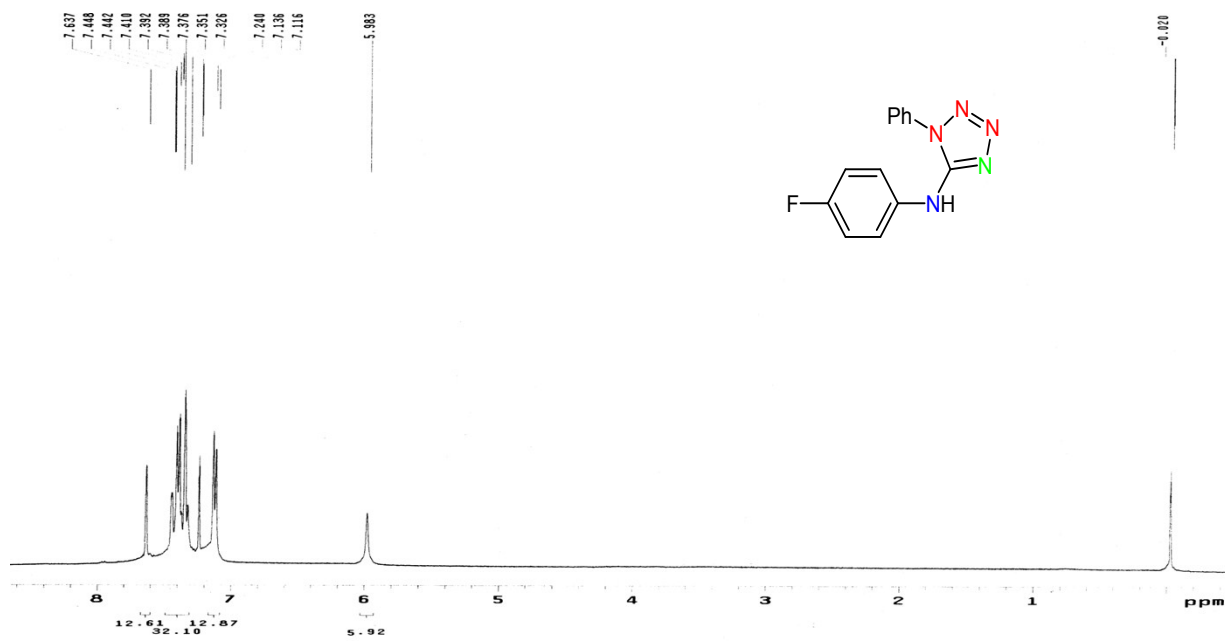

<sup>1</sup>H NMR Spectra of Compound-D

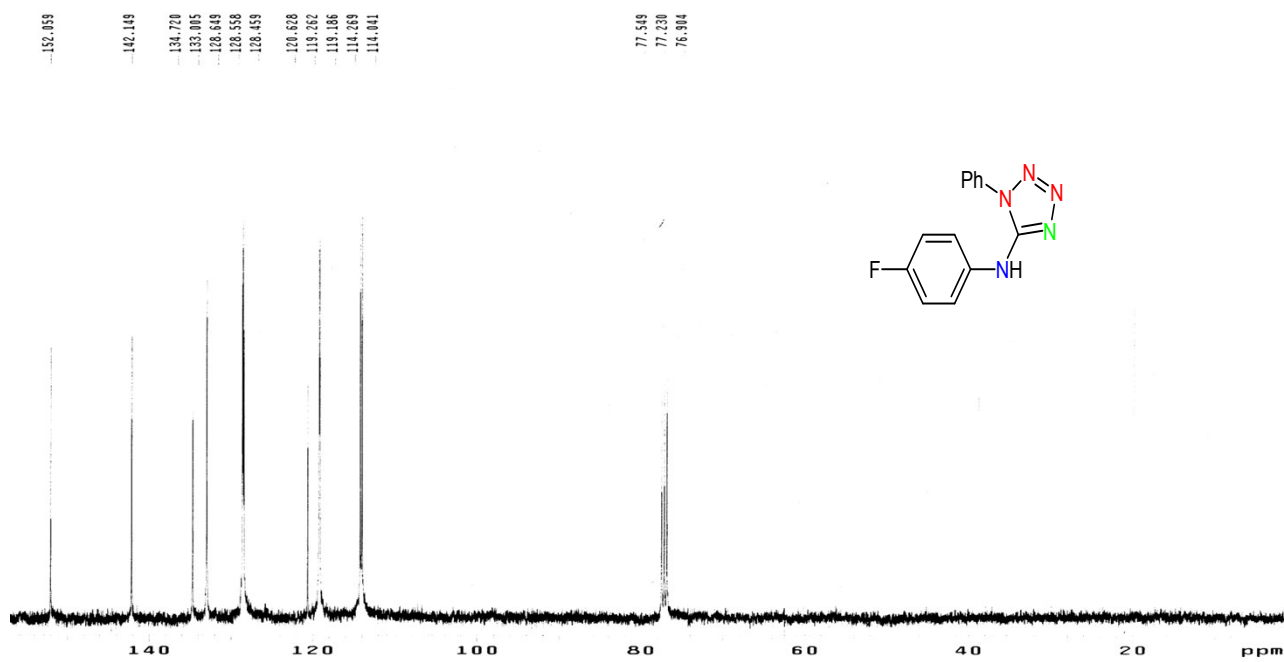

### <sup>13</sup>C NMR Spectra of Compound-D

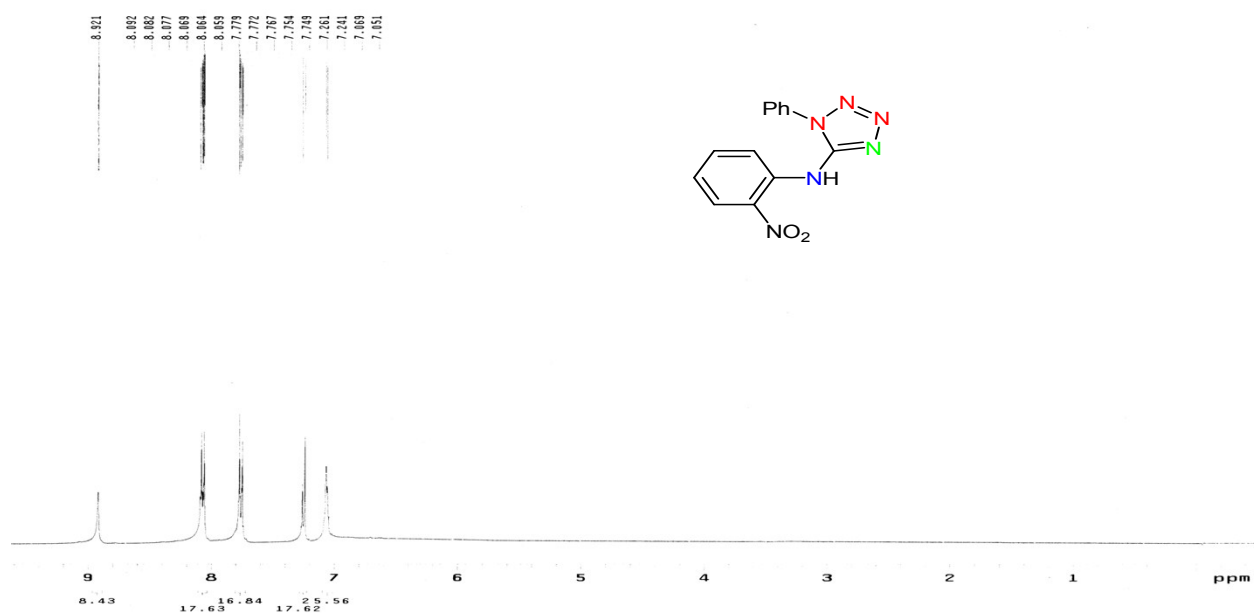

### <sup>1</sup>H NMR Spectra of Compound-E

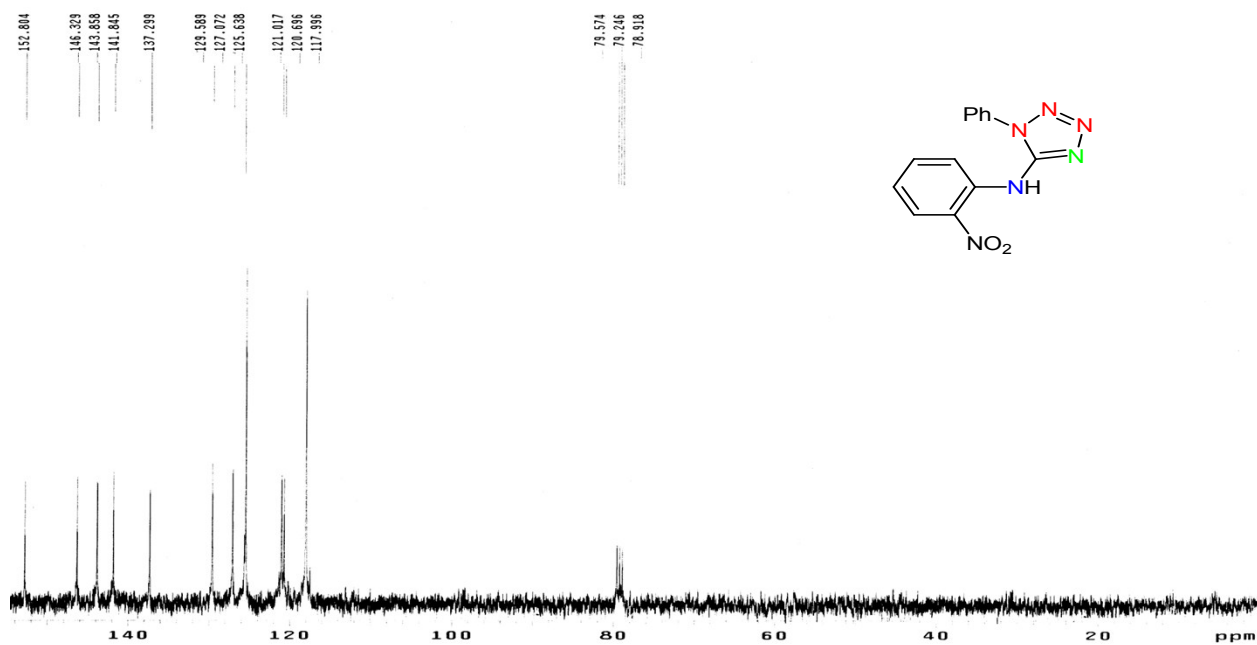

### <sup>13</sup>C NMR Spectra of Compound-E

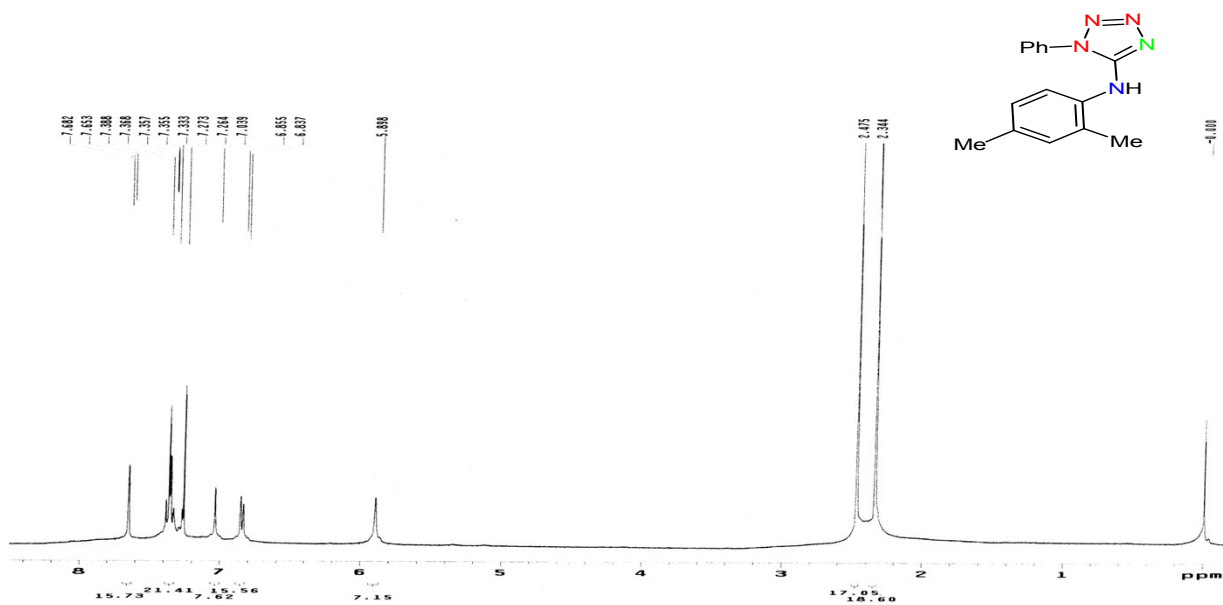

### <sup>1</sup>H NMR Spectra of Compound-F

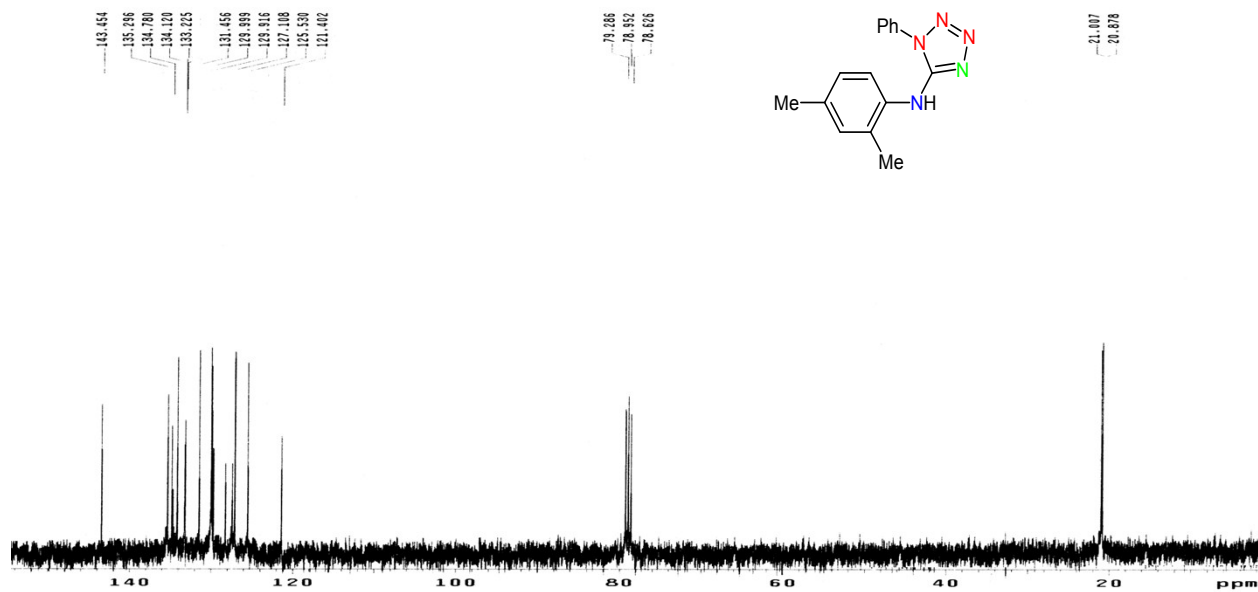

## $^{13}\text{C}$ NMR Spectra of Compound-F
